1  
2  
3  
4  
5  
6  
7  
8  
9  
10  
11  
12  
13  
14  
15  
16  
17  
18  
19  
20  
21  
22  
23  
24  
25  
26  
27  
28

# **Study on the influence of G82S RAGE polymorphism on RAGE- Amyloid interaction in AD pathology**

**Rani Cathrine. C<sup>1</sup>, Bincy Lukose<sup>1</sup> and P. Rani<sup>1\*</sup>**

**<sup>1</sup>Department of Biotechnology, PSG College of Technology, Coimbatore, Tamil Nadu India**

**\* Corresponding author**

**E-mail: [rani.bio@psgtech.ac.in](mailto:rani.bio@psgtech.ac.in)**

## 29 **Abstract**

30 Receptor for advanced glycation end products (RAGE) has been implicated in the  
31 pathophysiology of AD due to its ability to bind amyloid-beta and mediate inflammatory  
32 response. G82S RAGE polymorphism is associated with AD but the molecular mechanism for  
33 this association is not understood. Our previous *in silico* study indicated a higher binding  
34 affinity for mutated G82S RAGE, which could be caused due to changes in N linked  
35 glycosylation at residue N81. To confirm this hypothesis, in the present study molecular  
36 dynamics (MD) simulations were used to simulate the wild type (WT) and G82S glycosylated  
37 structures of RAGE to identify the global structural changes and to find the binding efficiency  
38 with A $\beta$ 42 peptide. Binding pocket analysis of the MD trajectory showed that cavity/binding  
39 pocket in mutant G82S glycosylated RAGE variants is more exposed and accessible to external  
40 ligands compared to WT RAGE, which can enhance the affinity of RAGE for A $\beta$ . To validate  
41 the above concept, an *in vitro* binding study was carried using SHSY5Y cell line expressing  
42 recombinant WT and mutated RAGE variant individually to which HiLyte Fluor labeled A $\beta$ 42  
43 was incubated at different concentrations. Saturated binding kinetics method was adopted to  
44 determine the  $K_d$  values for A $\beta$ 42 binding to RAGE. The  $K_d$  value for A $\beta$ 42- WT and A $\beta$ 42-  
45 mutant RAGE binding were  $92 \pm 40$  nM (95% CI-52 to 152nM;  $R^2$ -0.92) and  $45 \pm 20$  nM (95%  
46 CI -29 to 64nM;  $R^2$ -0.93), respectively. The  $K_d$  value of <100nM observed for both variants  
47 implicates RAGE as a high-affinity receptor for A $\beta$ 42 and mutant RAGE has higher affinity  
48 compared to WT. The alteration in binding affinity is responsible for activation of the  
49 inflammatory pathway as implicated by enhanced expression of TNF $\alpha$  and IL6 in mutant  
50 RAGE expressing cell line which gives a mechanistic view for the G82S RAGE association  
51 with AD.

52

## 53 **Introduction**

54 Receptor for Advanced Glycation End-products (RAGE) belongs to the immunoglobulin  
55 superfamily, which interacts with various ligands and plays an important role in several  
56 pathological conditions [1]. Due to alternative splicing, various isoforms are generated such as  
57 full-length RAGE (fRAGE), secretory RAGE (sRAGE) and dominant negative RAGE  
58 (DNAGE) and they bind to the ligands with similar affinity. The fRAGE consist of  
59 extracellular, hydrophobic transmembrane, and cytoplasmic domains, whereas sRAGE lacks a  
60 transmembrane domain. Extracellular domain has three immunoglobulins like domains namely  
61 variable (V) domain and two constant (C1 & C2) domains. The structural analysis of the ligand-  
62 binding domain within the V-domain structure of fRAGE indicates a hydrophobic cavity that  
63 is bordered by cationic residues and a flexible region (Thr55–Pro71). The flexible region  
64 allows further plasticity within the hydrophobic cavity, thereby promoting hydrostatic  
65 interactions with RAGE ligands [2,3]

66 Initiation of signal transduction upon the interaction of RAGE with its specific ligands helps  
67 in physiological processes such as chemotaxis, angiogenesis, inflammation, apoptosis, and  
68 proliferation [1,4]. The interaction of the same ligand with RAGE has different effects specific  
69 to the cell physiology where the activation of NF-kB helps in the survival of some cells and  
70 apoptosis of other cells [5]. As a multiligand receptor, fRAGE binds to the ligands like  
71 advanced glycosylation end products (AGEs), s100/calgranulins, amyloid-beta (A $\beta$ ) and  
72 amphoterin (HMGB1). Interaction of RAGE with AGEs results in acceleration of  
73 polymerization of A $\beta$ , which increases the accumulation of insoluble plaques of A $\beta$ , thereby  
74 enhances the risk of developing age-related disorders of CNS [6,7]. Excessive accumulation of  
75 these ligands tends to increase the inflammatory response and ROS production, resulting in  
76 cellular dysfunction.

77 RAGE, a potential contributor for neurodegeneration, has been implicated in accelerating  
78 degeneration and inflammation in neuronal tissues. The detrimental action of RAGE is exerted  
79 by its interaction with ligands which in turn activate the downstream pathways involving STAT,  
80 JKN, and NF-kB. Therefore, it has been indicated that the polymorphism within the ligand-  
81 binding domain of RAGE is associated with the activation of signal transduction pathways.  
82 There are several polymorphisms reported on the ligand-binding domain of RAGE. G82S  
83 polymorphism is one of the most frequently and naturally occurring single nucleotide  
84 polymorphisms (SNP) which enhances its affinity for ligand [8]. Thus, mutant expression shifts  
85 the signaling processes increases inflammation and contribute to several pathological  
86 conditions including Alzheimer's disease (AD). Association of G82S RAGE polymorphism  
87 with AD is reported in Chinese [9,10], Korean [11] and the Turkish population [12]. Enhanced  
88 interaction between A $\beta$  and fRAGE results in the activation of amyloid precursor protein (APP)  
89 cleaving enzyme that increases the production and the deposition of A $\beta$  in the form of amyloid  
90 plaques [13]. Besides this, increased transport of circulating A $\beta$  into the brain would be  
91 expected because RAGE has been shown to transport A $\beta$  across the blood-brain barrier  
92 into the brain [14]. The structural determinants involved in post-translational modifications,  
93 such as N-glycans shown to affect RAGE binding and signaling, possibly by altering its  
94 association with various cell surface molecules. The V-type ligand domain of RAGE has two  
95 potential N-linked glycosylation sites (N25 and N81) and Srikrishna *et al.* [15] has  
96 demonstrated that N25 carries complex N-glycans while N81 may be unmodified or partially  
97 glycosylated with hybrid or high mannose glycans. G82S polymorphism also shown to affect  
98 glycosylation patterns in RAGE which could alter binding affinity to its ligands [16]. It is  
99 essential to understand the interaction of RAGE and A $\beta$ , which would provide insight into its  
100 role in AD pathology and also to understand the molecular mechanism for the association of  
101 G82S RAGE polymorphism with AD.

102 The current study is designed to find RAGE- A $\beta$  interaction scenario by comparing WT RAGE  
103 and G82S mutant RAGE through in silico and in vitro studies and to get a clear mechanistic  
104 view on the influence of glycosylation pattern on ligand binding affinity.

## 105 **Materials and methods**

### 106 **Structures**

107 X-ray crystallographic structure of monomeric RAGE ectodomain (PDB ID human 3cjj) is  
108 used in this study. G82S mutation was created and homology modeling of this RAGE variant  
109 was done using SCWRL4 with 3cjj as the template. All molecular structures were generated  
110 using Pymol. The glycans were virtually attached to the protein structure using the glycoprotein  
111 builder of GLYCAM web server (<http://www.glycam.org>). A complex glycan (Man $\alpha$ (1,6)  
112 [GlcNAc $\beta$ (1,2) Man $\alpha$ (1,3)]Man $\beta$ (1,4)-GlcNAc $\beta$ (1,4) [Fuc $\alpha$ (1,6)]GlcNAc $\beta$ -OH) and a high  
113 mannose residue (Man $\alpha$ (1,2)-Man $\alpha$ (1,3)-Man $\alpha$ (1,6)-[Man $\alpha$ (1,3)]Man $\beta$ (1,4)-GlcNAc $\beta$ (1,4)-  
114 GlcNAc $\beta$ -OH) each having 7 carbohydrate units were added at the N25 and N81 position of  
115 the RAGE WT and mutant structures respectively.

### 116 **Molecular dynamics simulation**

#### 117 **Force fields**

118 MD Simulations were performed in Gromacs version 5.1. Glycans were modeled using the  
119 Glycam\_06j-1 force field and the Amber ff12SB force field was used to model amino acid  
120 atoms. The resultant structures in amber topology were exported to gromacs topology using  
121 the modified version of ACPYPE.

#### 122 **Simulation setup**

123 The structures of the glycosylated WT and mutant (G82S) form were simulated separately in a  
124 cubic periodic box with initial dimensions of  $12.58 \times 12.52 \times 12.52$  nm<sup>3</sup> such that the minimum  
125 distance between each RAGE glycoform to the periodic boundary is 1.5 nm. Both the

126 simulation system was solvated with an spc216 water  
127 Na<sup>+</sup> or Cl<sup>-</sup> ions, and then concentrated to 154 mM NaCl and energy minimized using steepest  
128 descent method. The energy minimized systems were equilibrated in the NVT ensemble  
129 followed by an NPT ensemble for 100 ps. The production dynamics were done in an  
130 isothermal-isobaric ensemble of 300K and 1 atm pressure for 50 ns. Both minimizations of  
131 energy were terminated using a maximum force tolerance of 1000 kJ mol<sup>-1</sup>nm<sup>-1</sup>. The  
132 temperature, pressure, and NaCl concentration were chosen in such a way that mimics human  
133 body conditions. The resultant trajectory was analyzed using VMD and cavity volumes were  
134 tracked using MD pocket webserver with a grid spacing of 1Å

### 135 **RAGE gene amplification and purification**

136 The peripheral blood mononuclear cells (PBMC) were isolated by HiSep LSM density gradient  
137 separation (Himedia, Mumbai, India) from human blood. Total RNA from PBMC was isolated  
138 using RNA-XPress™ reagent (Himedia, Mumbai, India). The quality of RNA was analyzed  
139 using nanospectrometer (Imple, USA). Total RNA (500ng) was then reverse-transcribed using  
140 RevertAid First Strand cDNA Synthesis Kit (Thermo Scientific, USA) and stored at -20° C  
141 until further use. The human fRAGE gene was amplified by using gene specific primers in 50µl  
142 reaction containing 100ng cDNA, 10pmol of each primer, and Ex-Taq polymerase (Takara Bio  
143 Inc., Japan).

144 Forward primer 5'TTAGGTACCATGGCAGCCGGAACAGCAGT3' and reverse primer  
145 5'TATGAATTCTCAAGGCC CTCCAGTACTAC 3' were used for amplification of human  
146 RAGE gene. The underlined sequences represent *KpnI* and *EcoRI* restriction sites, respectively.  
147 The expected product size is 1215 base pairs. PCR was performed and the product was purified  
148 from the 1% agarose gel using HiYield™ Gel/PCR DNA Mini Kit (Real Biotech Corporation,  
149 Taiwan).

## 150 **Cloning of WT RAGE gene and site-directed mutagenesis to create** 151 **mutant RAGE variant**

152 Cloning of the purified PCR product was done using InsTAclone PCR Cloning Kit (Thermo  
153 Fisher Scientific Inc., USA). The purified PCR product was ligated into pTZ57R/T vector and  
154 the recombinant vector was transformed into DH5 $\alpha$  strain of *Escherichia coli*. From the  
155 subcultures, plasmid was isolated using GeneJET Plasmid Miniprep Kit (Thermo Fisher  
156 Scientific Inc., USA). DNA sequencing was performed in both directions using universal  
157 primers for M13 which flanks the multiple cloning site of the plasmid. Sequencing was  
158 outsourced to Eurofins Pvt. Ltd, Bangalore, India. The sequence-verified RAGE (WT)  
159 pTZ57R/T construct was used to perform mutagenesis. Site-directed mutagenesis (STM) was  
160 performed to create 82G to 82S change by mutagenic PCR using Q5 Site-Directed Mutagenesis  
161 Kit, New England Biolabs (NEB, England). Mutagenic primers (Forward primer 5'  
162 CCTTCCCAACAGCTCCCTCTTC 3', Reverse Primer 5' ACACGAGCCACACTGTCC 3')  
163 were designed using the tool available in <http://nebasechanger.neb.com/>. The steps involved in  
164 performing mutagenic PCR are as follows: Exponential amplification of recombinant clone,  
165 Kinases, Ligases and DpnI (KLD) treatment and transformation. The plasmid was isolated  
166 from transformed clones using the GeneJET Plasmid Isolation Kit (Thermo Scientific Inc,  
167 USA). Plasmid sequencing was outsourced to Bioserve Technologies Pvt. Ltd, Hyderabad to  
168 confirm the inserted sequence changes and also to ensure that no other mutations were created.  
169 The created G82S mutation was confirmed by restriction profiling of fRAGE gene PCR product  
170 using an enzyme AflIII and Alu I. The size of fRAGE gene is about ~1.2 kb and it was first  
171 digested with AflIII which cut at the position 433. The restricted product was electrophoresed  
172 on 2% agarose gel. Two bands corresponding to 433bp and 782bp was observed. 433bp sized  
173 band was eluted from the gel and digested with Alu I enzyme (5' AGCT 3'). The digested  
174 product was electrophoresed on 4% agarose gel. When G is mutated to A at the position 250

175 of the fRAGE gene, this site was recognized by the Alu I enzyme which gives the size of 67bp,  
176 182bp and 184bp.

## 177 **Construct of expression cassette, cell culture, and transfection**

178 The WT and mutant RAGE were excised from pTZ57R/T vector using *KpnI* and *EcoRI* and  
179 cloned into pcDNA3.1 under the control of the CMV promoter. The transfection was performed  
180 in neuroblastoma cell line SHSY5Y procured from NCCS (Pune, India). Cells were cultured  
181 in modified Eagle's medium (MEM, Himedia), supplemented with 10% fetal bovine serum  
182 (FBS, Gibco, Invitrogen) and antibiotics (streptomycin sulfate and benzylpenicillin)  
183 individually at final concentrations of 100 U/ml (Himedia, India). Cells were cultured at 37°C  
184 with 5% CO<sub>2</sub> in tissue culture polystyrene dishes and transfected with pcDNA 3.1 recombinant  
185 vectors using jetPRIME kit, (Polyplus, France).

## 186 **Study on expression of recombinant RAGE variants SDS PAGE,**

### 187 **Western blotting, and ELISA**

188 Cells were lysed using RIPA lysis buffer (Himedia, Mumbai, India) and total protein  
189 concentration of cell lysate was determined by the BSA assay kit (Puregene, India). Cell lysate  
190 (15µg) were subjected to 12% SDS PAGE and western blotting. RAGE protein was detected  
191 using mouse monoclonal anti- RAGE antibody (E-1; Santa Cruz Biotech) and appropriate  
192 HRP-conjugated rabbit anti-mouse antibody at a dilution of 1:100 and 1:500 respectively. The  
193 beta-actin was detected using rabbit polyclonal anti-beta-actin antibody and secondary  
194 antibodies (HRP-conjugated Goat anti-rabbit antibody) were used at a dilution of 1:1000 and  
195 1:500 respectively. RAGE protein in cell lysate was quantified using a commercially available  
196 ELISA kit from Quantikine R&D systems (DRG00, USA) according to the manufacturer's  
197 instructions.

### 198 **Immunofluorescence**



199 Cells were fixed in 4% paraformaldehyde and then permeabilized samples were blocked with  
200 0.2% bovine serum albumin (BSA) for 45 minutes and incubated with primary anti RAGE  
201 antibody diluted in blocking buffer (0.2% BSA in PBS containing 0.02% Tween20, Santa Cruz  
202 Biotechnology, USA) for overnight at 4°C. Alex Fluor conjugated secondary antibody (Jackson  
203 Immuno research anti-mouse IgG) was added and incubated at 25 ° C for 45 min. The primary  
204 and secondary antibodies were used at a dilution of 1:200 and 1:100 respectively. Nuclei were  
205 counter-stained with DAPI for the determination of the viable cell number. The incubation  
206 medium was removed and the cells were stained for 10 min with DAPI (Invitrogen) in PBS  
207 with final concentration of 300nM. The specificity of binding was ascertained by performing  
208 the same procedure in the absence of the primary antibody (negative control). The samples  
209 were visualized using In cell 6000 microscope (GE Healthcare, USA). The images were  
210 background corrected using their corresponding negative controls and contrasted to the same  
211 levels using Image J software. The fluorescent images obtained were used to calculate the  
212 fluorescent intensity as shown in Fig 1 for the quantification of the expression of RAGE  
213 protein.

214 **Fig 1. Calculation procedure followed to determine fluorescent intensity from fluorescent**  
215 **image obtained in cell analyzer.**

## 216 **RAGE- A $\beta$ interaction in transfected cell line**

217 The experiment was performed to analyze the specific binding of A $\beta$  to WT and mutant RAGE.  
218 We have used only A $\beta$ 42 since it is more pathogenic than other forms. To determine the optimal  
219 concentration for A $\beta$  treatment, recombinant SHSY5Y cells were incubated with varying  
220 concentrations of A $\beta$ 42 (HiLyte Fluor labeled A $\beta$ 42, Anaspec) (50, 100, 150, 250, 500, 1000,  
221 1250, 1500nM) for 3 h and washed to remove unbound ligands. The amount of A $\beta$ 42 bound to  
222 the cells was measured as mean fluorescent intensity using In Cell 6000 microscopy (GE  
223 healthcare, USA). The specific binding of A $\beta$ 42 was calculated by subtracting the fluorescence

224 of cells in the absence of A $\beta$ 42 from that of fluorescence in the presence of varying  
225 concentrations of A $\beta$ 42. The data were analyzed using Image J software as described in  
226 Priesnitz *et al.* [17].

## 227 **Quantification of RAGE variants and inflammatory markers**

228 To study the RAGE expression and inflammatory pathway activation due to RAGE- A $\beta$   
229 interaction, WT, and mutant RAGE transfected cells (untreated) and ligand treated cells were  
230 taken for the study. RAGE expression and inflammatory pathway activation was assessed by  
231 qPCR. The experiment was performed in single ligand concentration and concentration for  
232 treatment was decided from the saturation curve obtained from the binding study. The cells  
233 were treated with 1 $\mu$ M concentration of A $\beta$  ligand for 3hrs and washed to remove unbound  
234 ligands. The cells were taken for the study after 48h and the experiments were performed in  
235 duplicate. Total RNA was isolated from transfected recombinant cells and ligand treated cells  
236 using RNA-XPress<sup>TM</sup> reagent (Himedia, Mumbai, India) according to the manufacturer's  
237 instructions. Extracted RNAs were quantified by nanospectrometer, (Imple, USA). Total RNA  
238 (1 $\mu$ g) was reverse-transcribed using RevertAid First Strand cDNA Synthesis Kit (Thermo  
239 Scientific, USA) and in a total volume of 25  $\mu$ L according to the manufacturer's instructions.  
240 Primers used for qPCR for quantification of total RAGE (fRAGE), sRAGE, TNF $\alpha$ , and IL6  
241 were represented in Table 1. The Glyceraldehyde-3-phosphate dehydrogenase (GAPDH) was  
242 used for internal normalization. RT-qPCR reactions were conducted in a 96-well plate using  
243 CFX96 Touch<sup>TM</sup> Real-Time PCR - Bio-Rad. Each reaction was performed in triplicate in 10  
244  $\mu$ L volume containing 1X SYBR Premix Ex Taq II (Takara Biotechnology), 50nM of each  
245 primer and 100ng of cDNA. The cycling conditions were as follows: 95 $^{\circ}$ C for 10 sec, followed  
246 by 40 cycles at 95 $^{\circ}$ C for 5 sec and 60 $^{\circ}$ C for 30 sec. The transcript copy number of genes was  
247 determined based on their Ct values and the expression levels were calculated using  $2^{-\Delta\Delta CT}$ .

248 **Table 1. Primers sequence used for analysis of RAGE variants by qPCR**

| Gene         | Primer sequences                                              | Product size (bp) |
|--------------|---------------------------------------------------------------|-------------------|
| fRAGE        | FP 5' GGGCAGTAGTAGGTGCTCAA 3'<br>RP5' TCCGGCCTGTGTTCAGTTTC 3' | 120               |
| sRAGE        | FP5' AGCATCATCGAACCAGGCGA 3'<br>RP5'TTTTCTGGGGCCTTCCATTC 3'   | 134               |
| TNF $\alpha$ | FP5' CCCAGGGACCTCTCTCTAATC<br>RP5' GGTTTGCTACAACATGGGCTACA    | 98                |
| GAPDH        | FP5' TGCACCACCAACTGCTTAG3'<br>RP5' GGATGCAGGGATGATGTTC3'      | 177               |

249

## 250 Results and discussion

### 251 Conformational stability of G82S RAGE variant

252 The side-chain conformation prediction of the mutated structure (G82S) was done in SCWRL  
253 which is based on the minimization of the total energy of the entire model and the  
254 corresponding assignment of rotamers. For predicting the stability change caused by single  
255 point mutation STRUM was used. STRUM prediction is based on the difference in the free  
256 energy gap between wild type ( $\Delta G_m$ ) and mutant protein ( $\Delta G_w$ ),  $\Delta\Delta G = \Delta G_m - \Delta G_w$ . A  $\Delta\Delta G$   
257 below zero indicates that the mutation causes destabilization [18].  $\Delta\Delta G$  value is negative for  
258 G82S RAGE (Table 2), which implies that G82S causes the destabilization of protein. Xie *et*  
259 *al.* [19] also reported that RAGE produced in bacteria lacking *N*-linked glycosylation due to  
260 G82S polymorphism causes a local change around the mutation site and a more global  
261 destabilization of the protein structure, with increased flexibility of the V-domain as shown by  
262 NMR spectroscopy.

263 **Table 2.  $\Delta\Delta G$  results from STRUM analysis**

| Protein | Polymorphic Position | Amino acid (wild type) | Amino acid (mutant type) | $\Delta\Delta G$ (Kcal/mol) |
|---------|----------------------|------------------------|--------------------------|-----------------------------|
| RAGE    | 82                   | G                      | S                        | -1.99                       |

264

265 Molecular dynamics has been carried out for 50 ns for both glycosylated form of WT and  
266 mutated RAGE. The initial and final conformations for both are shown in Fig 2A. When  $t = 0$   
267 ns, the conformation of both glycosylated WT and mutated RAGE is approximately the same  
268 and as time passes both the structures are deviating from the initial conformation. Root mean  
269 square deviation (RMSD) of the backbone atoms of the ectodomain of both wild type and  
270 mutated glycosylated RAGE structures are represented in Fig 2B. RMSD of glycosylated WT  
271 RAGE displays more fluctuations indicating that the conformational sampling of core  
272 backbone residues has not converged towards an equilibrium state within the 50 ns simulation  
273 period and has a lot of flexible side chain. However mutated RAGE variant attained stable  
274 conformation within the simulation time scale as evidenced by RMSD (Fig 2B). The secondary  
275 structure analysis by DSSP an inbuilt tool in GROMACS shown that most of the residues  
276 remained in  $\beta$ -sheet conformation throughout the simulation for both glycosylated systems (Fig  
277 2C).

## 278 **Binding pocket analysis**

279 For tracking ligand/small molecule binding sites on the RAGE structures, MD pocket has been  
280 used which is based on the cavity detection algorithm. MD pocket detects transient sub pockets  
281 using an ensemble of crystal structures from molecular dynamics (MDs) trajectories. Cavity  
282 volumes were generated with an MD pocket using a grid spacing of 1 Å. It has been found that  
283 the cavity/binding pocket in the polymorphic variant of glycosylated RAGE (G82S) is more  
284 exposed /accessible to external ligands compared to WT RAGE which suggests that G82S  
285 polymorphism enhances the ligand-binding affinity of RAGE (Fig 2D).

286 In the present modeling study, G82S RAGE glycosylated at N81 and N25 showed a more  
287 exposed binding cavity compared to the glycosylated WT RAGE. The result gives preliminary  
288 evidence that anionic glycosylation at Asn81 may favor the electrostatic interactions with the  
289 cationic residues in the hydrophobic ligand-binding cavity that could be contributing to the  
290 flexibility in V domain thereby enhancing the affinity of G82S RAGE to A $\beta$  peptides. Thus N-  
291 linked glycosylated Asn81 could play a major role in RAGE ligand binding, controlling the  
292 access and binding of ligand to the hydrophobic cavity.

293 **Fig 2. A) Initial and final conformations of the simulated glycosylated - WT RAGE,**  
294 **Mutant RAGE at t= 0 ns and t= 50 ns. B) Core backbone RMSD. Core backbone residues**  
295 **RMSD over 50 ns from the initial conformations for simulation of WT RAGE and mutant**  
296 **RAGE. C) DSSP analysis of glycosylated WT RAGE and mutant RAGE  $\square$  Coil,  $\blacksquare$   $\beta$ -**  
297 **Sheet,  $\blacksquare$   $\beta$ -Bridge,  $\blacksquare$  Bend,  $\blacksquare$  Turn,  $\blacksquare$  3-Helix. D) Binding pockets in glycosylated WT**  
298 **RAGE and mutant RAGE. Colors range from blue (low density = no particular cavity)**  
299 **to red (high density = conserved cavity).**

### 300 **Site-directed mutagenesis of G82S RAGE gene confirmation**

301 Genome-wide association study is widely conducted to help in developing a more accurate  
302 therapeutic and diagnostic target for various kinds of human diseases. Several epidemiological  
303 studies have been performed showing the association between RAGE polymorphism and  
304 various diseases namely rheumatoid arthritis [20], type 1 and 2 diabetes [21-23] and coronary  
305 artery diseases [24]. Functional SNP in RAGE namely G82S polymorphism is shown to be  
306 associated with increased risk for AD [9,10].

307 The gradient PCR with gene specific primers was used for amplification of fRAGE gene. The  
308 PCR product was electrophoresed in 1% agarose gel. Expected product size of 1215bp  
309 corresponding to fRAGE was observed in annealing temperature of 69 -72°C (Fig 3A). The  
310 purified PCR product was cloned into pTZ57R/T vector and sequence verified. The fRAGE

311 gene was further cloned into mammalian expression vector - pcDNA3.1 (Fig 3B) and the  
312 cloned product was restricted to confirm product insertion (Figs 3 C and D) and the orientation  
313 of the cloned gene as shown in Figs 3 E and F.

314 **Fig 3 A) PCR product of amplified fRAGE gene. L1 -100bp marker; Lane 2-5 annealing**  
315 **temperature 69-72°C; L6 -1Kb marker. B) Schematic representation of recombinant**  
316 **pcDNA3.1 vector with fRAGE construct. The PCR product were cloned into pTZ57R/T**  
317 **vector. The pTZ57R/T fRAGE contract and pcDNA3.1vector was restriction digested**  
318 **using *KpnI* and *EcoRI* and fragment was then inserted into pcDNA3.1 vector under the**  
319 **control of CMV promoter. C) Schematic representation of restriction pattern of**  
320 **recombinant pcDNA3.1 harbouring fRAGE gene. D) Restriction digestion of**  
321 **recombinant pcDNA3.1 construct with *KpnI* and *EcoRI* were electrophoresed in a 1%**  
322 **agarose gel. L1- 1kb DNA ladder, L2- pcDNA3.1 with WT RAGE (undigested), L3-**  
323 **pcDNA3.1 with WT RAGE (digested), L4- pcDNA3.1 with mutant RAGE (undigested),**  
324 **L5- pcDNA3.1 with mutant RAGE (digested), L6 - pcDNA3.1 vector (digested). Band size**  
325 **of 1.2kb shown in lane 3 & 5 indicates the presence of RAGE gene in recombinant**  
326 **pcDNA3.1 respectively. E) Schematic representation of orientation-based restriction**  
327 **pattern of recombinant RAGE gene in pcDNA3.1 vector. F) To confirm orientation of**  
328 **cloned RAGE gene recombinant pcDNA3.1 construct was restricted with *KpnI* and *SmaI***  
329 **and digested products were electrophoresed in a 2% agarose gel. L1- 1kb DNA step**  
330 **ladder, L2- 100bp DNA ladder, L3- recombinant WT RAGE pcDNA3.1 (digested), L4-**  
331 **recombinant WT RAGE pcDNA3.1 (undigested), L5- recombinant mutant RAGE**  
332 **pcDNA3.1 (digested), L6- recombinant mutant RAGE pcDNA3.1 (undigested). Band size**  
333 **of 593bp, 1750bp, 4272bp shown in lane 3 & 5 indicates the correct orientation of WT**  
334 **RAGE and mutant RAGE gene respectively in recombinant pcDNA3.1.**

335

336 To create the G82S mutant RAGE variant, the site-directed mutagenesis was performed in  
337 pTZ57R/T with the WT RAGE construct (Fig 4A). The creation of the G82S RAGE variant  
338 was confirmed by restriction profiling and sequencing. The restriction digestion confirmed the  
339 substitution of A instead of G (Figs 4B, C, D and E). The sequencing results, which was  
340 analyzed using DNA baser assembler software. The switch from G to A in gene sequence and  
341 Glycine to serine in the translated sequence were confirmed as shown in Figs 4F, G and H.

342 **Fig 4 A) Schematic representation of site directed mutagenesis performed in pTZ57R/T**  
343 **RAGE construct. B) Restriction Mapping of WT & mutant RAGE with AflIII and Alu I**  
344 **enzyme. C) Amplification of WT & mutant RAGE gene. L1-1kb DNA ladder, L2 & 3 –**  
345 **WT RAGE PCR product, L4 & 5 – Mutant RAGE PCR product. D) Restriction profile**  
346 **of AflIII digested fRAGE gene PCR product. L1- 100bp step up DNA ladder, L2- WT**  
347 **RAGE gene PCR product, L3- AflIII digested WT RAGE gene PCR product, L4- Mutant**  
348 **RAGE gene PCR product, L5- AflIII digested mutant RAGE gene PCR product. E)**  
349 **Restriction profiling of WT and mutant RAGE gene. L1-100bp step up DNA ladder, L2-**  
350 **empty, L3- Alu I digested WT RAGE gene fragment, L4- Alu I digested mutant RAGE**  
351 **gene fragment. F) Sequence confirmation of mutation in RAGE gene. Top row represents**  
352 **wild type nucleotide sequence and bottom row represent the mutant type sequence (G**  
353 **mutated to A in RAGE gene). G) Sequence chromatogram of WT and mutant RAGE**  
354 **sequence obtained from DNA baser assembler software. Red boxes highlight the**  
355 **sequencing location of the RAGE gene with G>A nucleotide change resulting in a G82S**  
356 **mutation. H) Representation of nucleotide change from G to A in RAGE gene which**  
357 **results in amino acid mutation at 82 position from Gly to Ser.**

### 358 **Confirmation of RAGE expression in transfected SHSY5Y cell line**

359 The WT and G82S mutant RAGE variants transfected and were expressed in transfected  
360 SHSY5Y cell line. The expression of RAGE was initially established by SDS-PAGE and



361 western blotting of whole cell lysate (Figs 5A and B). The presence of 45kDA and 54KDa  
362 proteins indicates the expression of beta-actin and recombinant RAGE protein, which was  
363 confirmed through western blotting. The ELISA result of cell lysate also showed increased  
364 expression RAGE protein in transfected cells than non-transfected controls (Fig 5C). The mean  
365 fluorescent intensity was found to be 2-fold higher in transfected cell lines than empty vector-  
366 transfected cells and also non-transfected control cells (Figs 5D and E) confirming the  
367 expression of transfected RAGE gene.

368 **Fig 5 Protein profiling of transfected RAGE cell. A) SDS PAGE gel with cell lysate. B)**  
369 **Western blot analysis of RAGE in transfected and non-transfected cells. C)**  
370 **Quantification of RAGE expression using ELISA, bar graph depicts the mean RAGE**  
371 **expression level and error bars represents the standard error mean. D) Relative**  
372 **quantification of RAGE expression using fluorescent intensity obtained from fluorescent**  
373 **image of controls and transfected cells. E) Bar graph depicts the mean relative fluorescent**  
374 **intensity with error bars represents the standard error mean for RAGE protein**  
375 **expression. Cells were incubated with Alex Fluor tagged secondary antibody (30 min),**  
376 **DAPI (10min) and imaged. Scale bar correspond to 0.2mm in all images.**

### 377 **G82S mutation in RAGE enhances A $\beta$ 42 binding affinity**

378 Representative In Cell analyzer image of interaction of A $\beta$ 42 with RAGE in non-transfected,  
379 pcDNA3.1 transfected, recombinant WT and mutant RAGE transfected cells were given in Fig  
380 6A. Expression of recombinant RAGE (WT and mutant) in SHSY5Y cells were confirmed  
381 through Alex Fluor tagged secondary antibody. The images of recombinant WT and mutant  
382 RAGE transfected cells incubated with varying concentrations of A $\beta$ 42 were represented in  
383 Figs 6B and C. which indicates a specific binding of A $\beta$ 42 to recombinant RAGE and also  
384 enhanced binding of A $\beta$ 42 to mutated RAGE. Binding of A $\beta$ 42 to RAGE increased up to



385 500nM concentration and saturated kinetics was observed beyond this concentration for both  
386 WT and mutant RAGE.

387 **Fig 6 Interaction of A $\beta$ 42 with RAGE. A) representative image of controls and transfected**  
388 **cell lines immunostained with Alex fluor (secondary antibody) and DAPI after treating**  
389 **with HiLyte fluor labelled A $\beta$ 42 (1 $\mu$ M). B) Recombinant WT and C) mutant RAGE**  
390 **expressing SHSY5Y cells were incubated with varying concentrations of A $\beta$ 42 (50 -1500**  
391 **nM) (HiLyte Fluor labelled A $\beta$ 42, Anaspec).**

392 A saturated binding kinetics method was adopted to determine the  $K_d$  value for A $\beta$ 42 binding  
393 to RAGE. The  $K_d$  value for WT RAGE and mutated RAGE were 92nM  $\pm$ 40nM (95% CI-52 to  
394 152nM;  $R^2$ -0.92) and 45nM $\pm$ 20nM (95% CI -29 to 64nM;  $R^2$ -0.93;  $p$ <0.05) respectively which  
395 indicates that both RAGE variants are high-affinity receptor for A $\beta$ 42.  $K_d$  value for mutated  
396 RAGE was lower than WT RAGE indicating a significant increase in affinity for mutated  
397 RAGE for A $\beta$ 42 binding than WT RAGE (Figs 7 A, B and C). This explains the enhanced  
398 function associated with RAGE variants with G82S polymorphism.

399 **Fig 7 Binding curves of HiLyte Fluor – labelled A $\beta$ 42 interaction to WT RAGE and**  
400 **mutant RAGE in SHSY5Y cell lines. A) WT RAGE; B) mutant RAGE; C) Merge of WT**  
401 **and mutant RAGE. Transfected cells were incubated with increasing concentration of**  
402 **A $\beta$ 42 (HiLyte fluor labelled ligand). To calculate  $K_d$  of the interaction of A $\beta$ 42 to RAGE**  
403 **the mean fluorescent intensity of the A $\beta$ 42 bound vs. A $\beta$ 42 concentration added was fit to**  
404 **the equation  $Y=B_{max} X/(K_d + X)$  using GraphPad prism software. The values are the**  
405 **average of five trails.**

406 This G82S polymorphism occurs nearby to Asn81 one of the potential N-linked glycosylation  
407 sites. It is hypothesized that this modification plays a major role in RAGE- ligand interaction.  
408 This might be because glycine at 82<sup>nd</sup> position is more flexible than serine. Also, it gives a  
409 probable clue that in WT RAGE, the N81th position may not be glycosylated. G82S

410 polymorphism might stabilize the N-linked glycosylation at N81 thereby giving structural  
411 stability to the mutated RAGE than glycosylated WT RAGE. Previously, it has been shown  
412 that Asn25 in WT RAGE is always modified with fully processed N-linked glycan, whereas  
413 Asn81 is not favored for N-linked glycosylation. More recent studies indicate that Asn81 is  
414 also glycosylated in G82S polymorphic RAGE and this polymorphism might affect RAGE  
415 glycosylation [15].

## 416 **RAGE-A $\beta$ interaction influences expression of RAGE variants**

417 The NF $\kappa$ B activation is mediated by upstream pathways including RAGE-amyloid interaction  
418 and once NF $\kappa$ B is activated it creates an alteration in RAGE expression. To study this  
419 alteration in the expression of RAGE isoforms, qPCR was performed to quantify fRAGE and  
420 sRAGE. The qPCR results showed a similar range of fRAGE expression in both WT and  
421 mutant RAGE expressing cells when not treated with A $\beta$ 42, whereas the expression levels in  
422 A $\beta$ 42 treated cells showed a marginal increase in expression (Fig 8A). The enhanced  
423 expression of fRAGE could be a result of a positive loop mechanism of upregulating the  
424 expression of RAGE by amplifying the cellular response due to external stress. This notion is  
425 supported by the finding that fRAGE expression is increased in AD brains [25,26].

426 sRAGE expression is higher in ligand untreated cells which decreased drastically upon A $\beta$ 42  
427 treatment. The decreased expression of sRAGE could be due to alteration in the expression  
428 of RAGE isoforms. Besides, it's been shown that 82S carriers have roughly half the  
429 maximum amount of sRAGE when compared with 82G carriers [9, 11], implying that the  
430 increased ligand affinity of RAGE receptor leads to a dysregulation of RAGE isoforms.  
431 Since sRAGE acts as a decoy receptor for A $\beta$  binding and decrease in sRAGE expression  
432 during A $\beta$  treatment might decrease A $\beta$  clearance and further lead to A $\beta$  burden. This  
433 G82S polymorphism along with A $\beta$  burden could thereby enhance fRAGE production, thus  
434 giving little room for sRAGE to exert its proposed protective mechanisms. Thereby both

435 mechanisms namely decreased sRAGE expression and increased fRAGE expression can  
436 contribute to AD pathogenicity.

### 437 **RAGE-A $\beta$ interaction elicits inflammatory response**

438 The RAGE receptor which binds to a variety of proinflammatory ligands transmits the signal  
439 from the ligand to NF $\kappa$ B regulated cytokines production. To confirm the inflammatory pathway  
440 activation due to RAGE-A $\beta$  interaction, the cells were exposed to A $\beta$ 42 and tested for  
441 cytokines levels (TNF $\alpha$  and IL6). The qPCR results confirmed the increased expression of pro-  
442 inflammatory cytokines upon A $\beta$ 42 interaction. Comparatively higher expression of TNF- $\alpha$   
443 (9.8-fold), IL6 (15.13-fold) were observed in A $\beta$ 42 treated cells than untreated cells. A similar  
444 trend was also observed in the mutant RAGE expressed cell line. The expression of TNF $\alpha$  and  
445 IL6 were higher in mutated RAGE expressed cells than WT RAGE as shown in Figs 8B and  
446 C.

447 The RAGE- A $\beta$  interaction induces the inflammatory pathways as demonstrated by an  
448 increased expression of proinflammatory cytokines such as TNF $\alpha$  and IL6. The  
449 observation confirms that RAGE – A $\beta$  interaction evokes a cascade of downstream pro-  
450 inflammatory signaling pathways and this effect is more prominent in G82S RAGE  
451 polymorphism.

452 **Fig 8 Relative quantification of recombinant RAGE variants and Inflammatory markers**  
453 **expression using qPCR. A) RAGE variant expression; B) TNF- $\alpha$ ; C) IL6. Bar graph**  
454 **depicts the mean gene expression levels and expression values are obtained by  $2^{-\Delta\Delta CT}$ .**

### 455 **Conclusions**

456 In our study, we report that G82S polymorphism stabilizes RAGE glycosylation at Asn81  
457 suggesting that the increase in flexibility of the V-domain caused by the global destabilization

458 effect of G82S mutation might be the cause for more exposed binding cavity in polymorphic  
459 glycosylated RAGE which enhances the ligand-binding affinity of RAGE towards A $\beta$ .  
460 Our study suggests that expression of RAGE is increased at sites of A $\beta$ 42 accumulation and  
461 polymorphisms within ligand-binding regions (G82S) alters RAGE variant expressions leading  
462 to enhanced fRAGE and decreased sRAGE expression thereby amplifying the inflammatory  
463 response. These results cumulatively suggest that RAGE is a potential candidate for a  
464 therapeutic approach in AD. This can be envisaged by using sRAGE therapeutically to clear  
465 A $\beta$  or by using antibody complimentary to A $\beta$  binding region of fRAGE to prevent  
466 inflammatory process in AD.

## 467 **References**

- 468 1. Ding Q, Keller JN. Splice variants of the receptor for advanced glycosylation end  
469 products (RAGE) in human brain. *Neuroscience letters*. 2004 Dec 13;373(1):67-72.
- 470 2. Matsumoto S, Yoshida T, Murata H, Harada S, Fujita N, Nakamura S, Yamamoto Y,  
471 Watanabe T, Yonekura H, Yamamoto H, Ohkubo T. Solution Structure of the Variable-Type  
472 Domain of the Receptor for Advanced Glycation End Products: New Insight into AGE-  
473 RAGE Interaction. *Biochemistry*. 2008 Oct 29;47(47):12299-311.
- 474 3. Park H, Boyington JC. The 1.5 Å crystal structure of human receptor for advanced glycation  
475 endproducts (RAGE) ectodomains reveals unique features determining ligand binding.  
476 *Journal of Biological Chemistry*. 2010 Dec 24;285(52):40762-70.
- 477 4. Sorci G, Riuzzi F, Giambanco I, Donato R. RAGE in tissue homeostasis, repair and  
478 regeneration. *Biochimica Et Biophysica Acta (BBA)-Molecular Cell Research*. 2013  
479 Jan 1;1833(1):101-9.
- 480 5. Du Yan S, Chen X, Fu J, Chen M, Zhu H, Roher A, Slattery T, Zhao L, Nagashima M,  
481 Morser J, Migheli A. RAGE and amyloid- $\beta$  peptide neurotoxicity in Alzheimer's  
482 disease. *Nature*. 1996 Aug;382(6593):685.
- 483 6. Schmidt AM, Du Yan S, Yan SF, Stern DM. The multiligand receptor RAGE as a  
484 progression factor amplifying immune and inflammatory responses. *The Journal of*  
485 *clinical investigation*. 2001 Oct 1;108(7):949-55.
- 486 7. Bucciarelli LG, Wendt T, Qu W, Lu Y, Lalla E, Rong LL, Goova MT, Moser B,  
487 Kislinger T, Lee DC, Kashyap Y. RAGE blockade stabilizes established atherosclerosis  
488 in diabetic apolipoprotein E-null mice. *Circulation*. 2002 Nov 26;106(22):2827-35.
- 489 8. Krishnan S, Ravi S, Ponmalai S, Rani P. A Molecular Dynamics Study on RAGE-A $\beta$ 42  
490 Interaction and the Influence of G82S RAGE Polymorphism on A $\beta$  Interaction.  
491 *International Journal Bioautomation*. 2015 Oct 1;19(4).

- 492 9. Li K, Dai D, Zhao B, Yao L, Yao S, Wang B, Yang Z. Association between the RAGE  
493 G82S polymorphism and Alzheimer's disease. *Journal of neural transmission*. 2010 Jan  
494 1;117(1):97.
- 495 10. Daborg J, von Otter M, Sjölander A, Nilsson S, Minthon L, Gustafson DR, Skoog I,  
496 Blennow K, Zetterberg H. Association of the RAGE G82S polymorphism with  
497 Alzheimer's disease. *Journal of neural transmission*. 2010 Jul 1;117(7):861-7.
- 498 11. Jang Y, Kim JY, Kang SM, Kim JS, Chae JS, Kim OY, Koh SJ, Lee HC, Ahn CW,  
499 Song YD, Lee JH. Association of the Gly82Ser polymorphism in the receptor for  
500 advanced glycation end products (RAGE) gene with circulating levels of soluble RAGE  
501 and inflammatory markers in nondiabetic and nonobese Koreans. *Metabolism*. 2007  
502 Feb 1;56(2):199-205.
- 503 12. Ataç ZS, Alaylıoğlu M, Dursun E, Gezen-Ak D, Yilmazer S, Gürvit H. G82S  
504 polymorphism of receptor for advanced glycation end products gene and serum soluble  
505 RAGE levels in mild cognitive impairment and dementia of Alzheimer's type patients  
506 in Turkish population. *Journal of Clinical Neuroscience*. 2019 Jan 1;59:197-201.
- 507 13. Choi BR, Cho WH, Kim J, Lee HJ, Chung C, Jeon WK, Han JS. Increased expression  
508 of the receptor for advanced glycation end products in neurons and astrocytes in a triple  
509 transgenic mouse model of Alzheimer's disease. *Experimental & molecular medicine*.  
510 2014 Feb;46(2):e75.
- 511 14. Deane R, Du Yan S, Subramanian RK, LaRue B, Jovanovic S, Hogg E, Welch D,  
512 Manness L, Lin C, Yu J, Zhu H. RAGE mediates amyloid- $\beta$  peptide transport across  
513 the blood-brain barrier and accumulation in brain. *Nature medicine*. 2003 Jul;9(7):907.
- 514 15. Srikrishna G, Nayak J, Weigle B, Temme A, Foell D, Hazelwood L, Olsson A,  
515 Volkman N, Hanein D, Freeze HH. Carboxylated N-glycans on RAGE promote  
516 S100A12 binding and signaling. *Journal of cellular biochemistry*. 2010 Jun  
517 1;110(3):645-59.
- 518 16. Park SJ, Kleffmann T, Hessien PA. The G82S polymorphism promotes glycosylation  
519 of the receptor for advanced glycation end products (RAGE) at asparagine 81  
520 comparison of wild-type rage with the g82s polymorphic variant. *Journal of Biological  
521 Chemistry*. 2011 Jun 17;286(24):21384-92.
- 522 17. Priesnitz C, Sperber S, Garg R, Orsini M, Noor F. Fluorescence based cell counting in  
523 collagen monolayer cultures of primary hepatocytes. *Cytotechnology*. 2016 Aug  
524 1;68(4):1647-53.
- 525 18. Quan L, Lv Q, Zhang Y. STRUM: structure-based prediction of protein stability  
526 changes upon single-point mutation. *Bioinformatics*. 2016 Jun 17;32(19):2936-46.
- 527 19. Xie J, Reverdatto S, Frolov A, Hoffmann R, Burz DS, Shekhtman A. Structural basis  
528 for pattern recognition by the receptor for advanced glycation end products (RAGE).  
529 *Journal of Biological Chemistry*. 2008 Oct 3;283(40):27255-69.
- 530 20. Hofmann MA, Drury S, Hudson BI, Gleason MR, Qu W, Lu Y, Lalla E, Chitnis S,  
531 Monteiro J, Stickland MH, Bucciarelli LG. RAGE and arthritis: the G82S  
532 polymorphism amplifies the inflammatory response. *Genes and immunity*. 2002  
533 May;3(3):123.

- 534 21. Kančová K, Vasku A, Hájek D, Zahejsky J, VASKU V. Association of G82S  
535 polymorphism in the RAGE gene with skin complications in type 2 diabetes. *Diabetes*  
536 *Care*. 1999 Oct 1;22(10):1745.
- 537 22. Kumaramanickavel G, Ramprasad VL, Sripriya S, Upadyay NK, Paul PG, Sharma T.  
538 Association of Gly82Ser polymorphism in the RAGE gene with diabetic retinopathy in  
539 type II diabetic Asian Indian patients. *Journal of Diabetes and its Complications*. 2002  
540 Nov 1;16(6):391-4.
- 541 23. Prevost G, Fajardy I, Besmond C, Balkau B, Tichet J, Fontaine P, Danze PM, Marre  
542 M. Polymorphisms of the receptor of advanced glycation endproducts (RAGE) and the  
543 development of nephropathy in type 1 diabetic patients. *Diabetes & metabolism*. 2005  
544 Feb 1;31(1):35-9.
- 545 24. Yoon SJ, Park S, Shim CY, Park CM, Ko YG, Choi D, Park HY, Oh B, Kim H, Jang  
546 Y, Chung N. Association of RAGE gene polymorphisms with coronary artery disease  
547 in the Korean population. *Coronary artery disease*. 2007 Feb 1;18(1):1-8.
- 548 25. Lue LF, Walker DG, Brachova L, Beach TG, Rogers J, Schmidt AM, Stern DM, Du  
549 Yan S. Involvement of microglial receptor for advanced glycation endproducts (RAGE)  
550 in Alzheimer's disease: identification of a cellular activation mechanism. *Experimental*  
551 *neurology*. 2001 Sep 1;171(1):29-45.
- 552 26. Miller MC, Tavares R, Johanson CE, Hovanesian V, Donahue JE, Gonzalez L,  
553 Silverberg GD, Stopa EG. Hippocampal RAGE immunoreactivity in early and  
554 advanced Alzheimer's disease. *Brain research*. 2008 Sep 16;1230:273-80.  
555

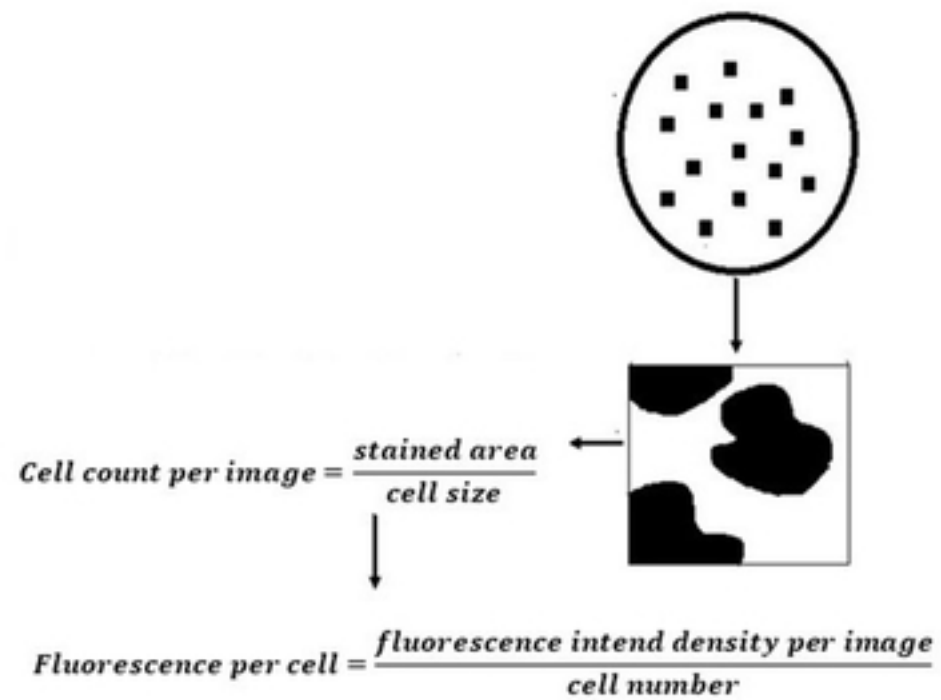

Figure 1



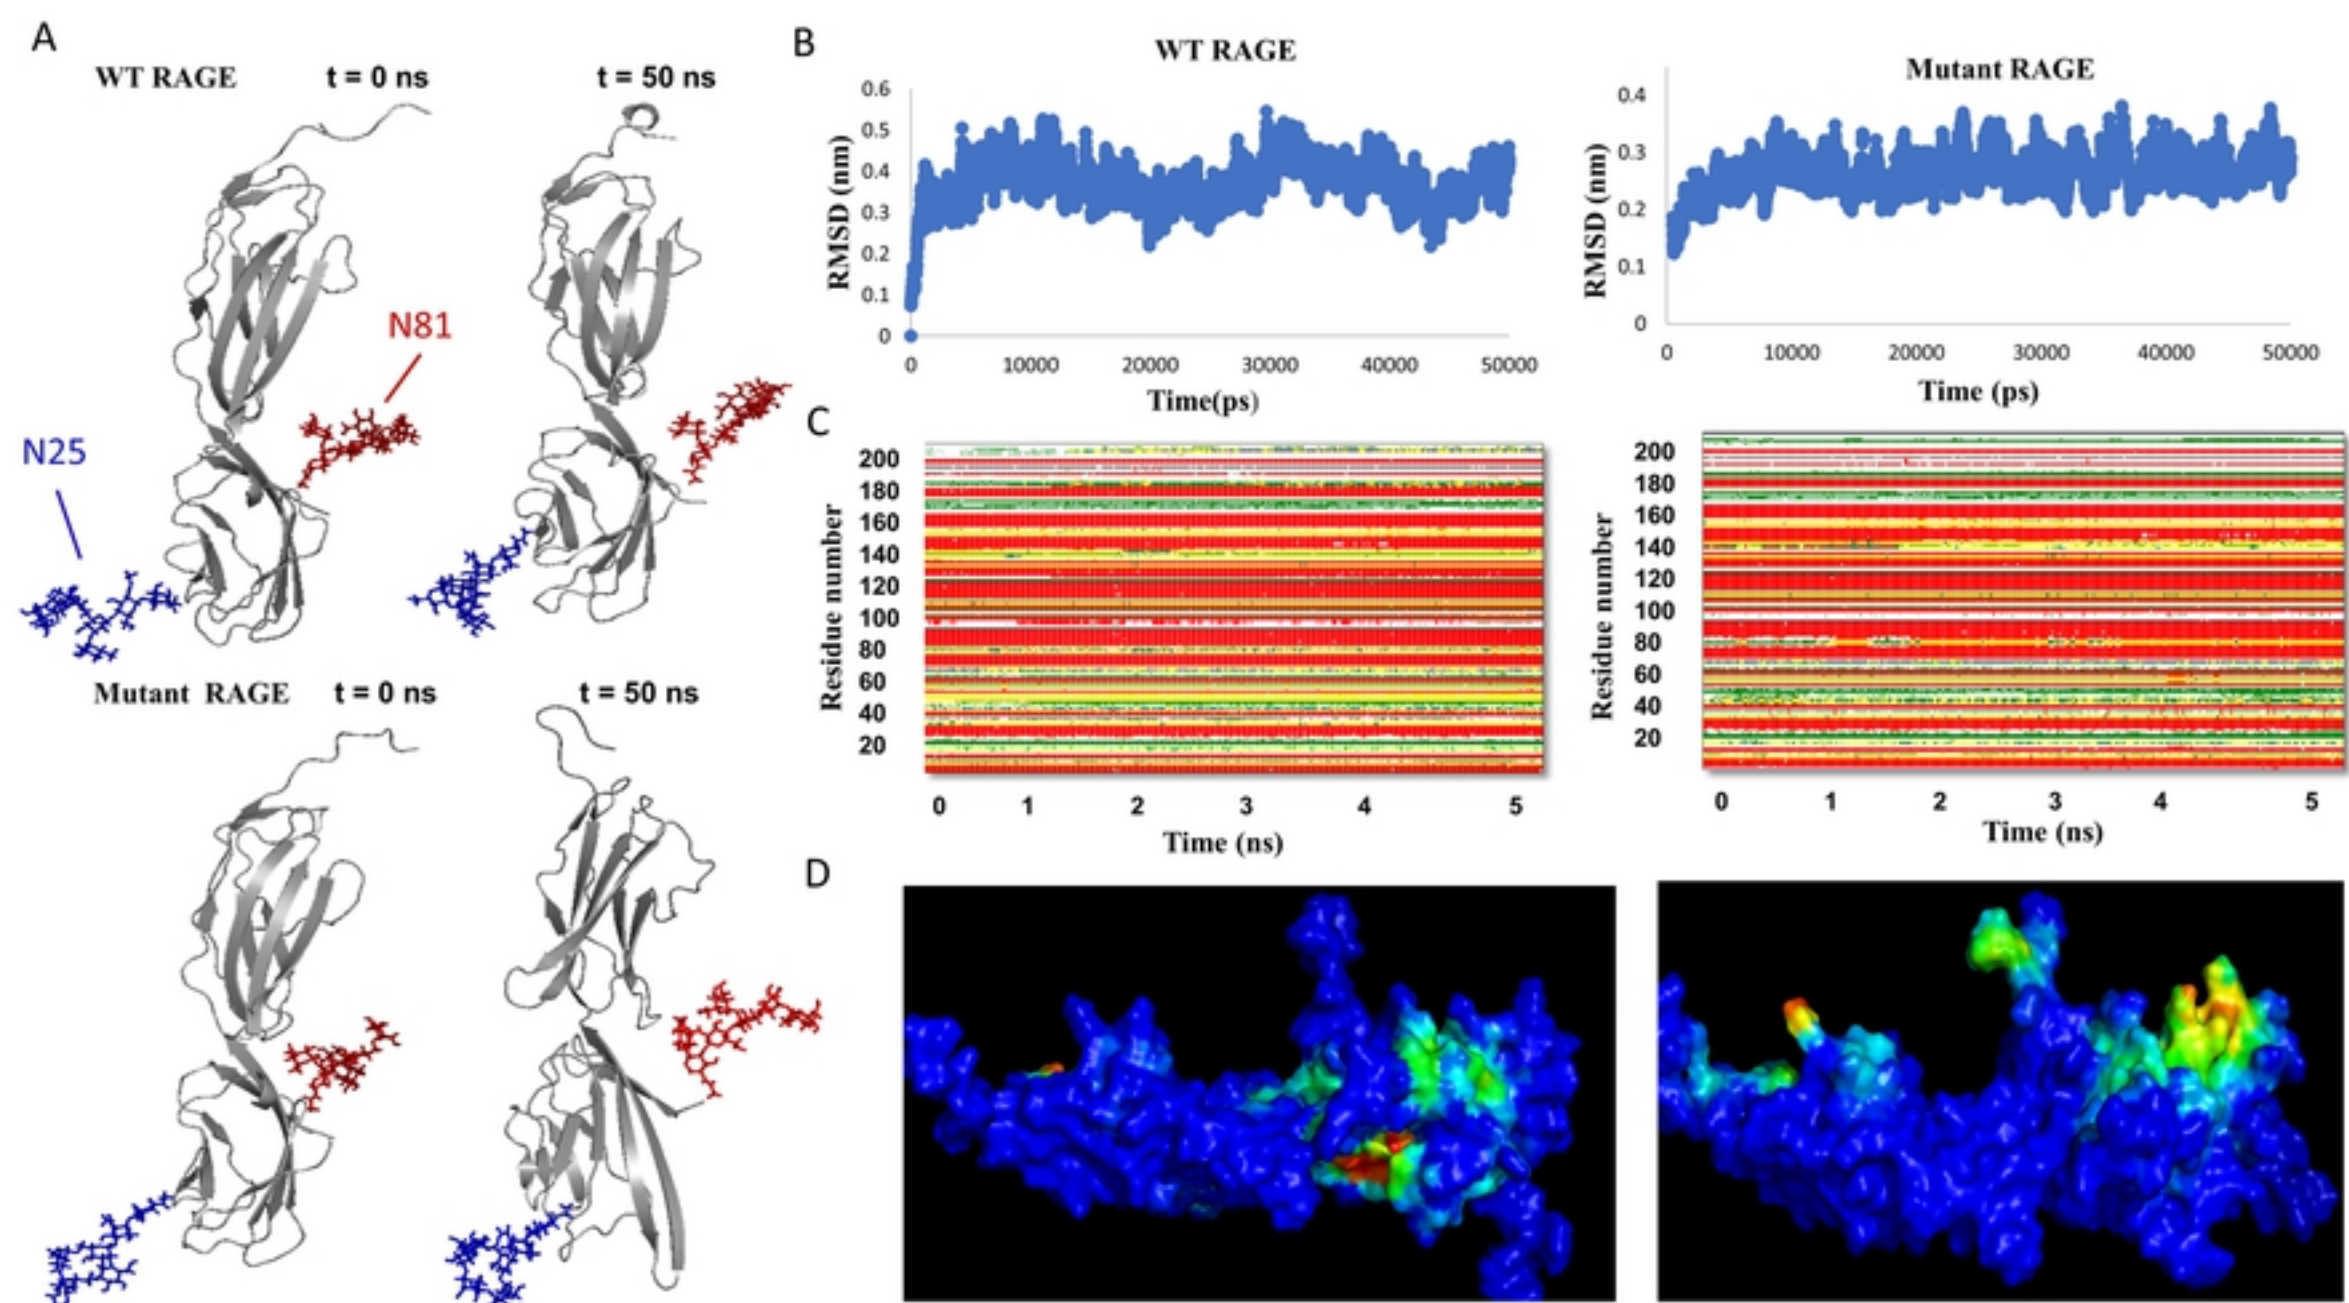

Figure 2



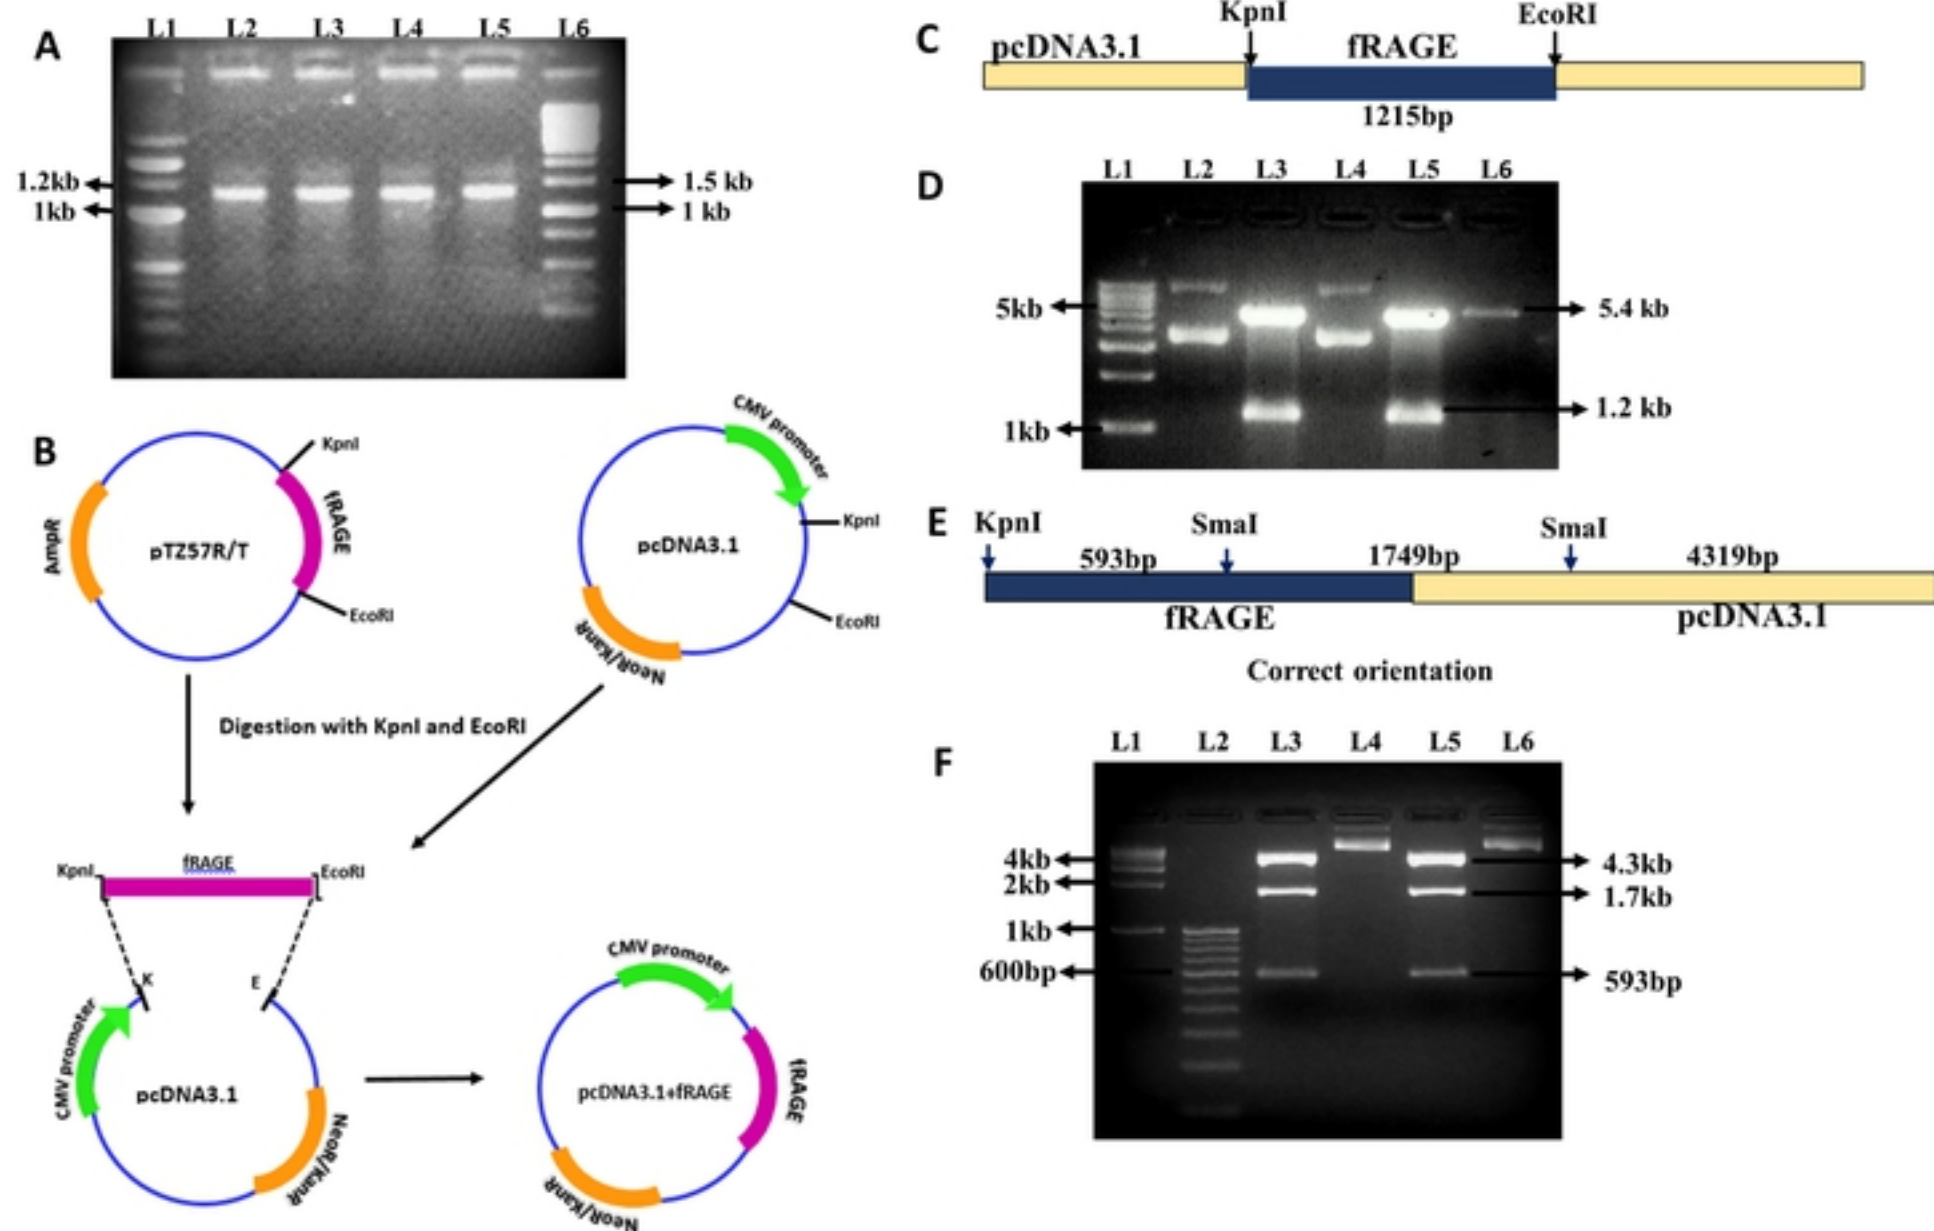

Figure 3

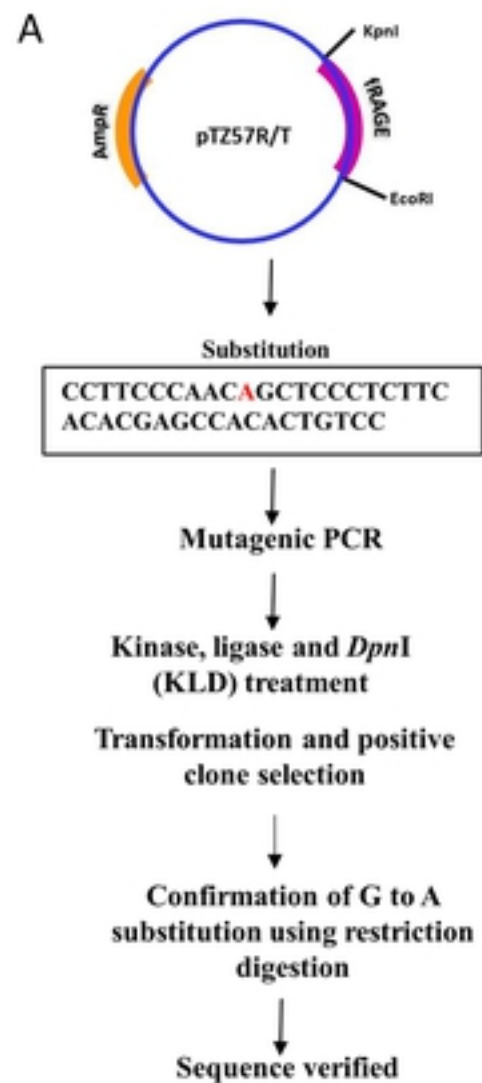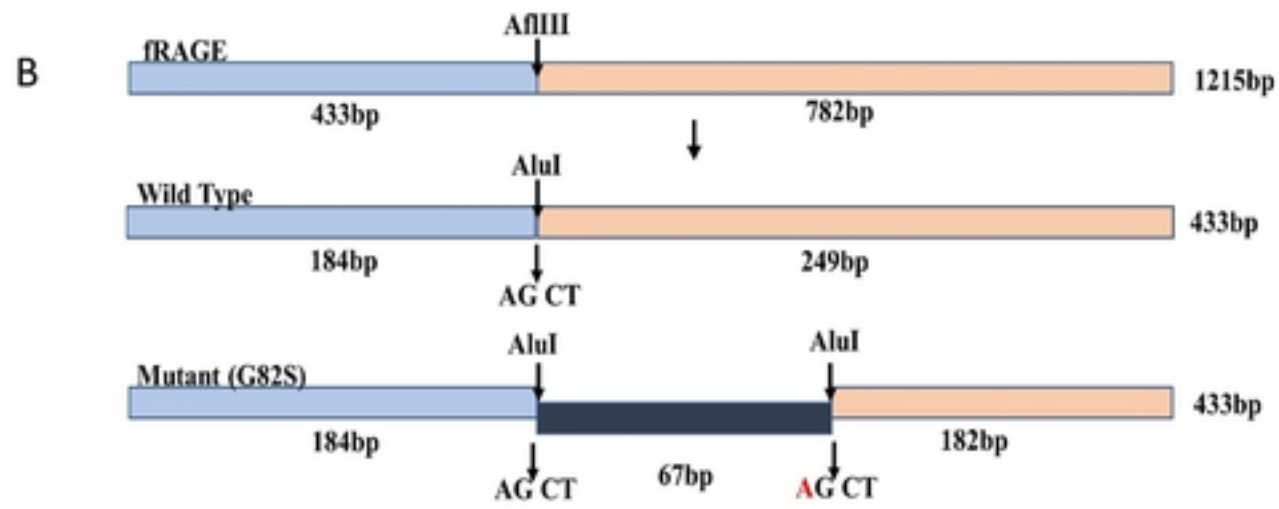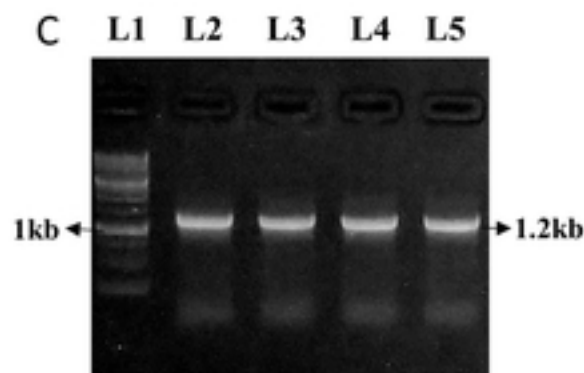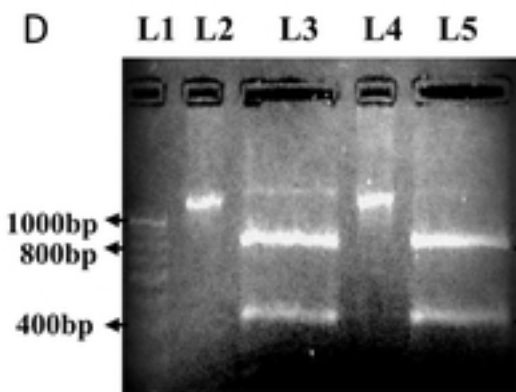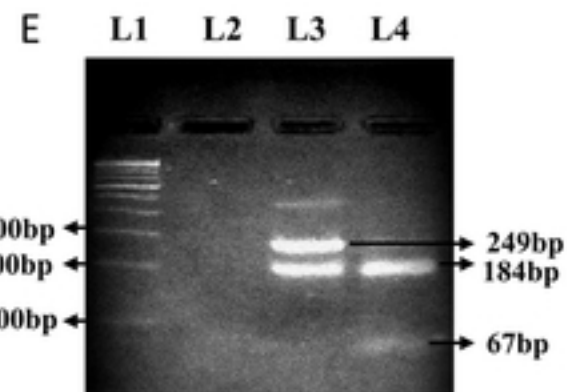

Figure 4A



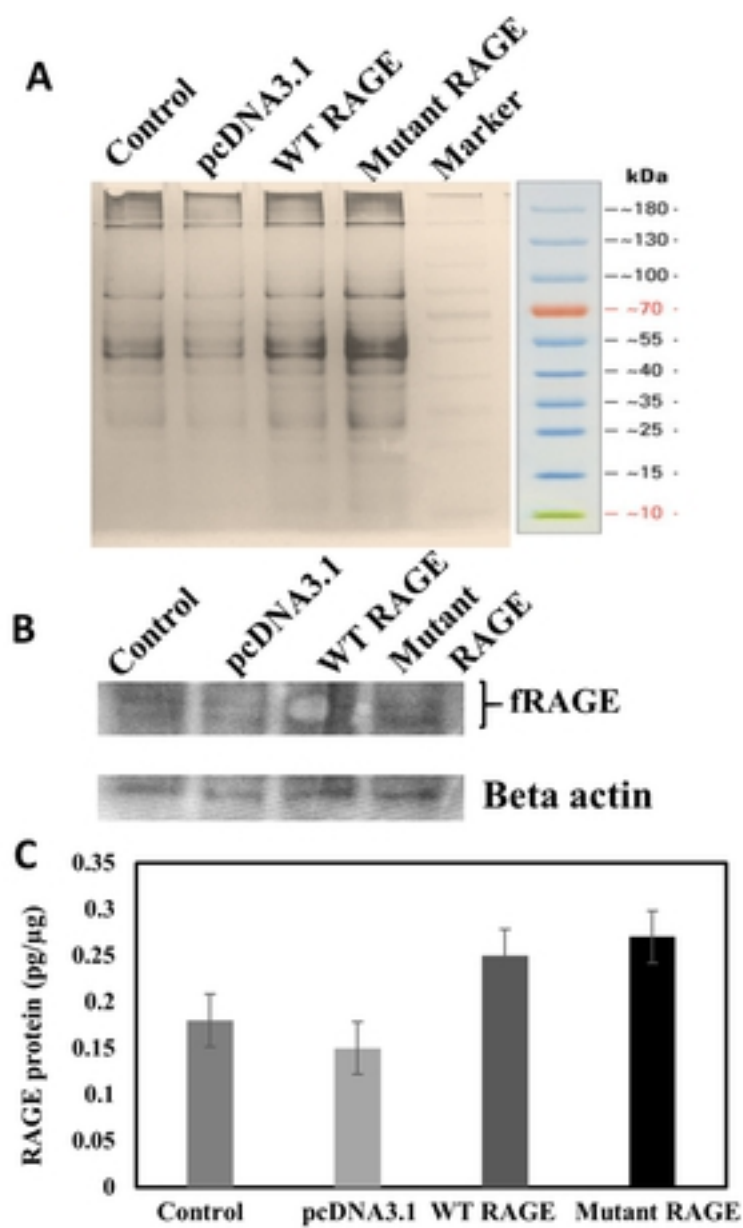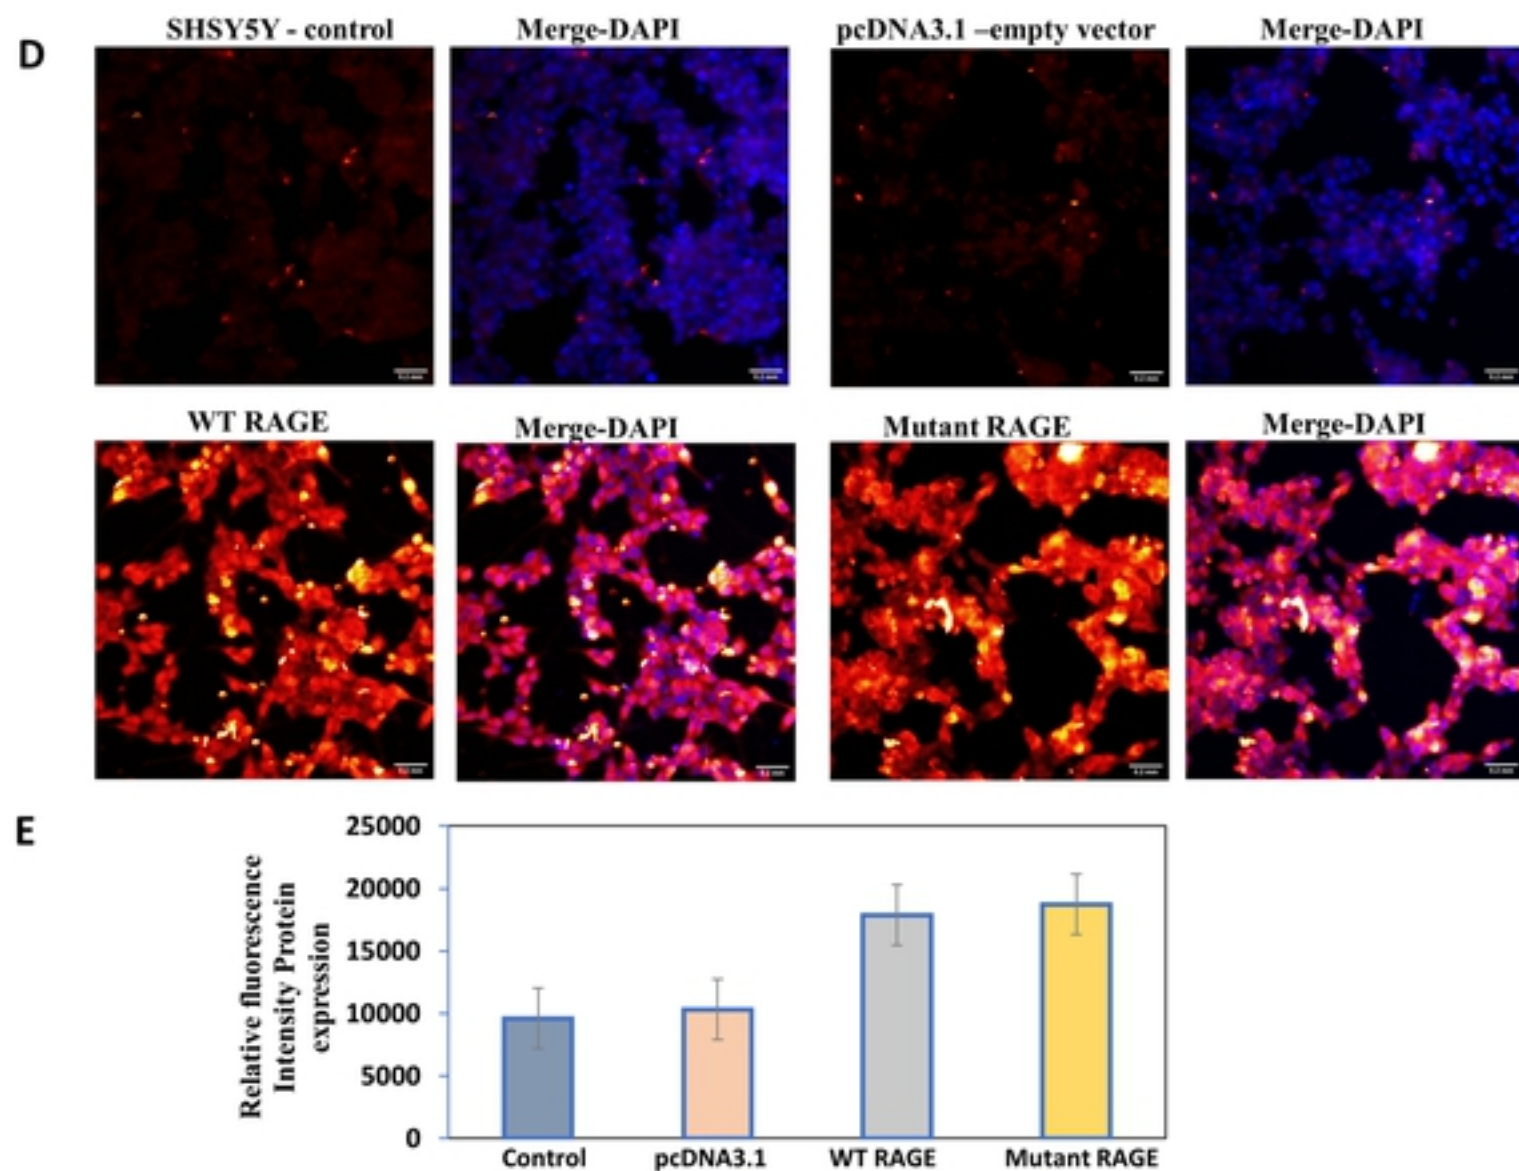

Figure 5



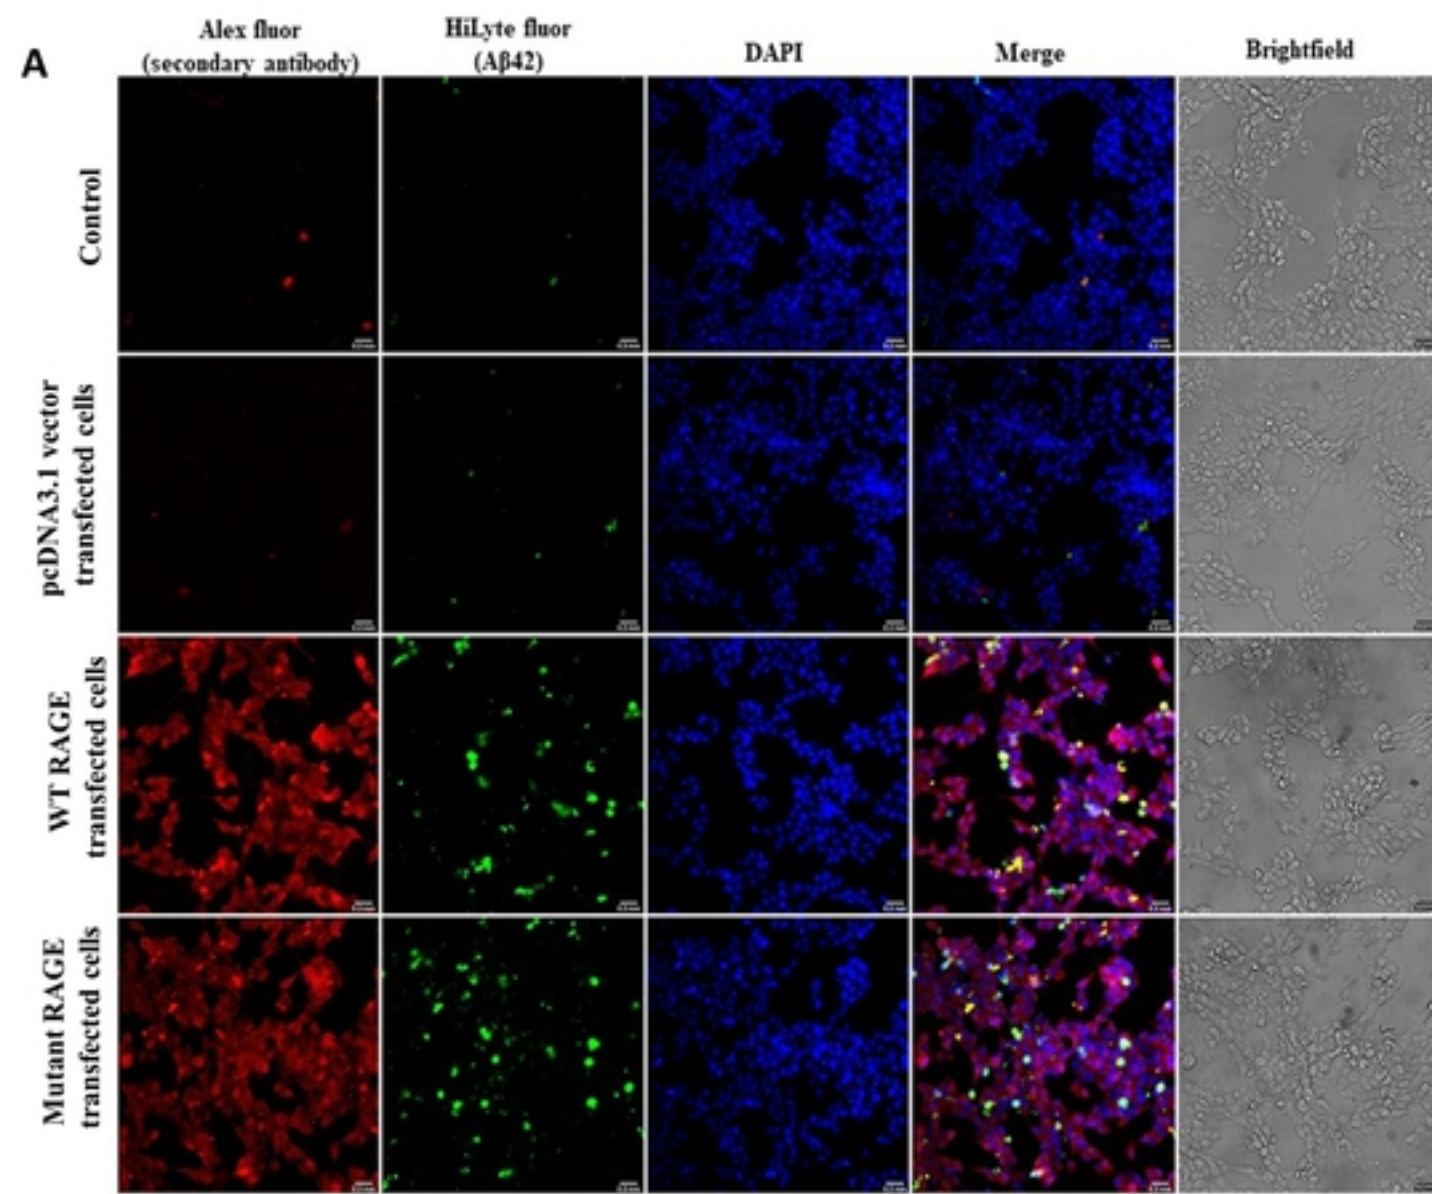

Figure 6A

**B WT RAGE- A $\beta$ 42 interaction**

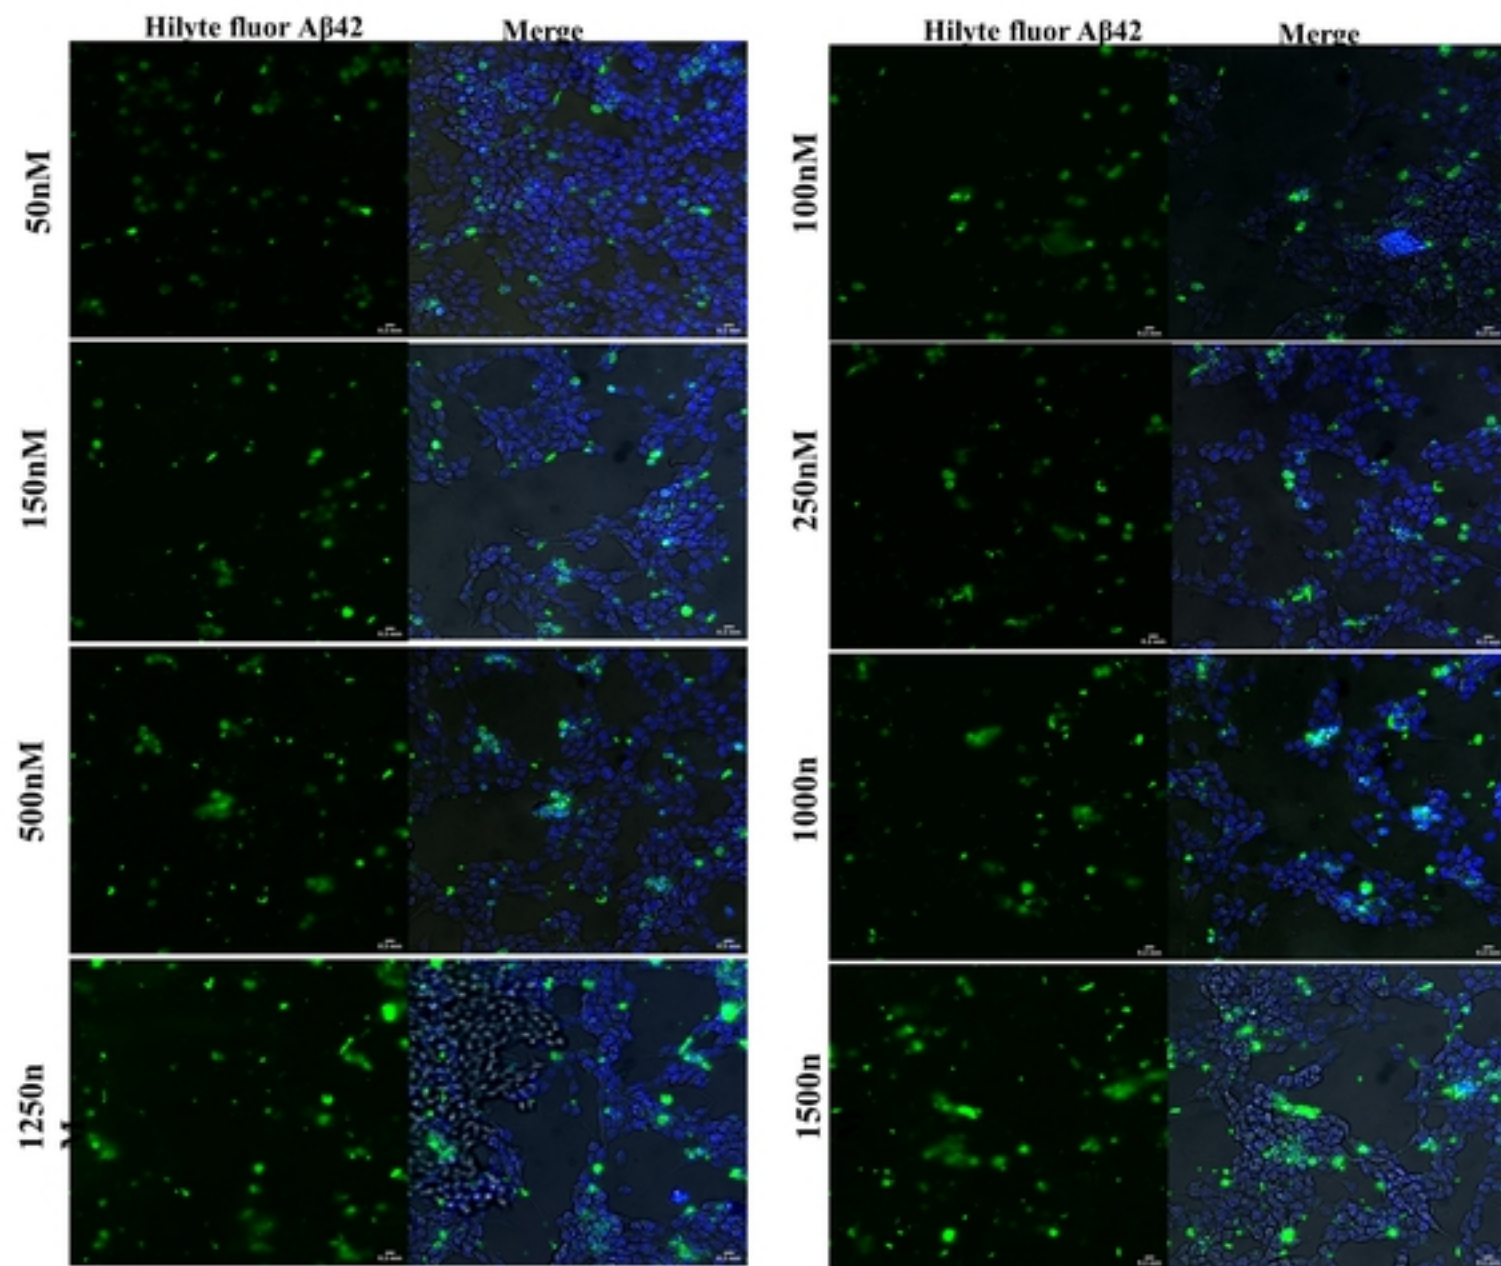

Figure 6B



**C Mutant RAGE- A $\beta$ 42 interaction**

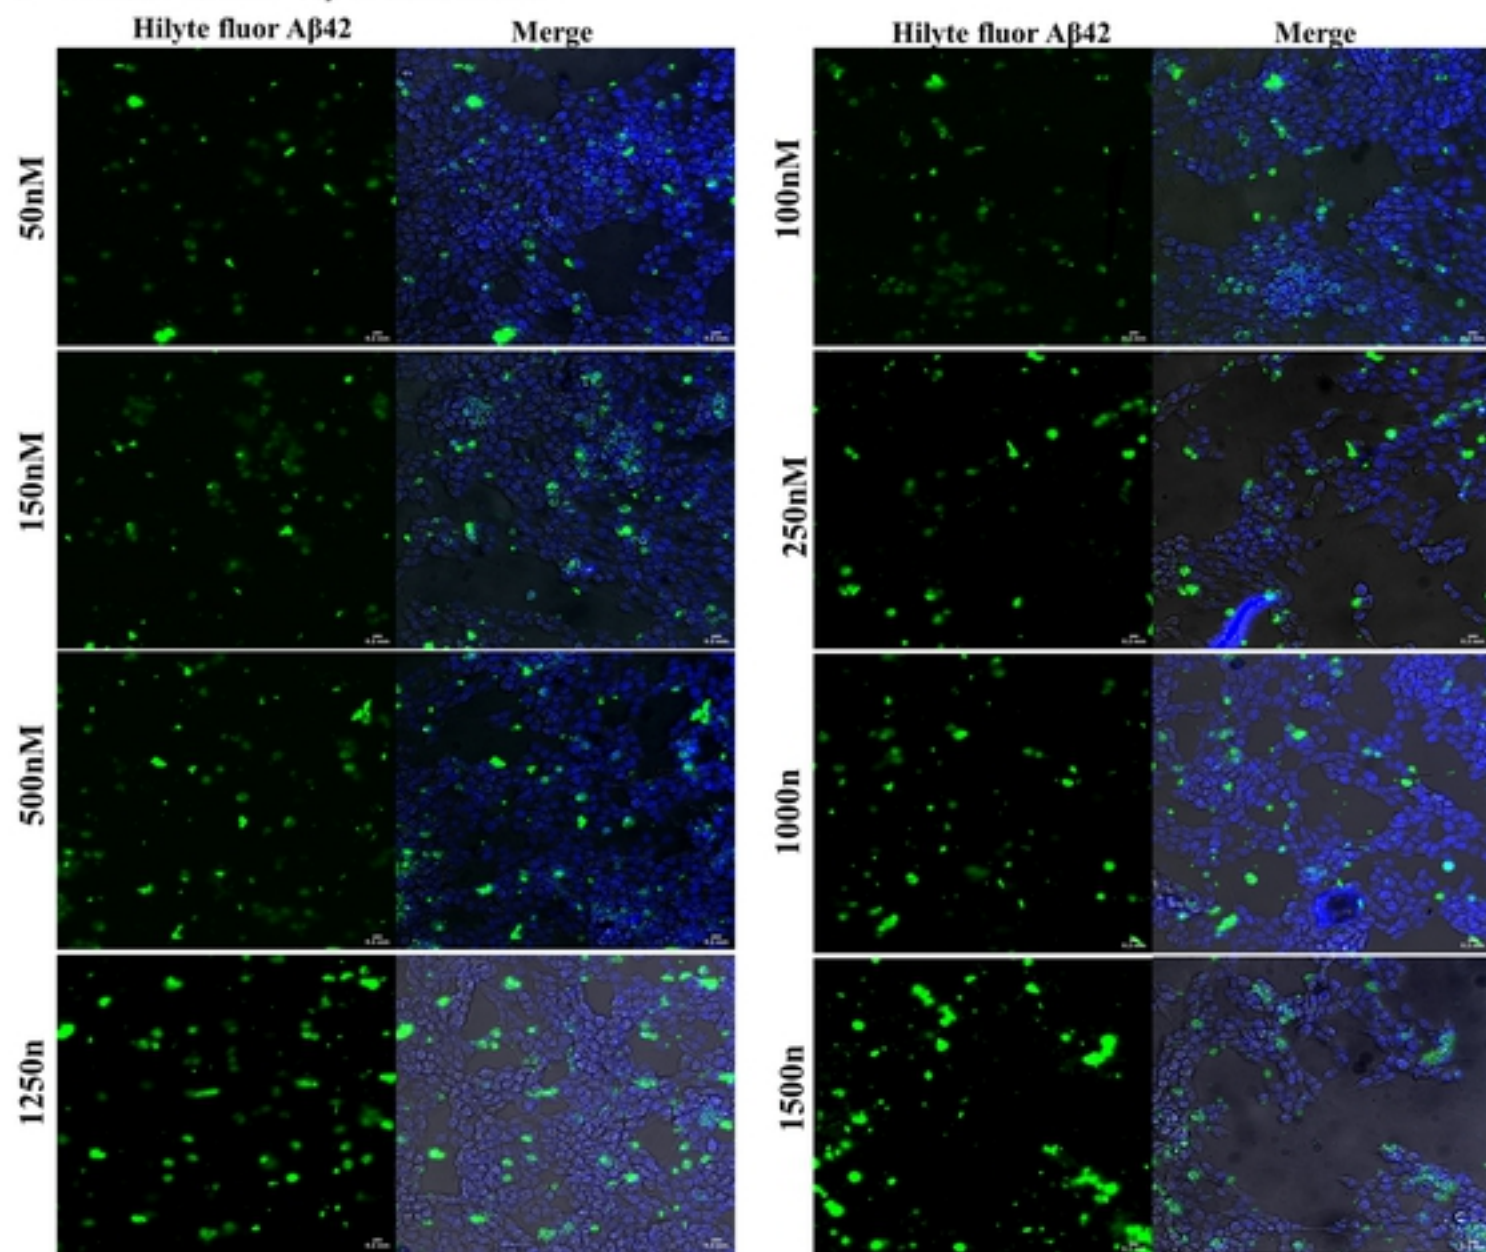

Figure 6C

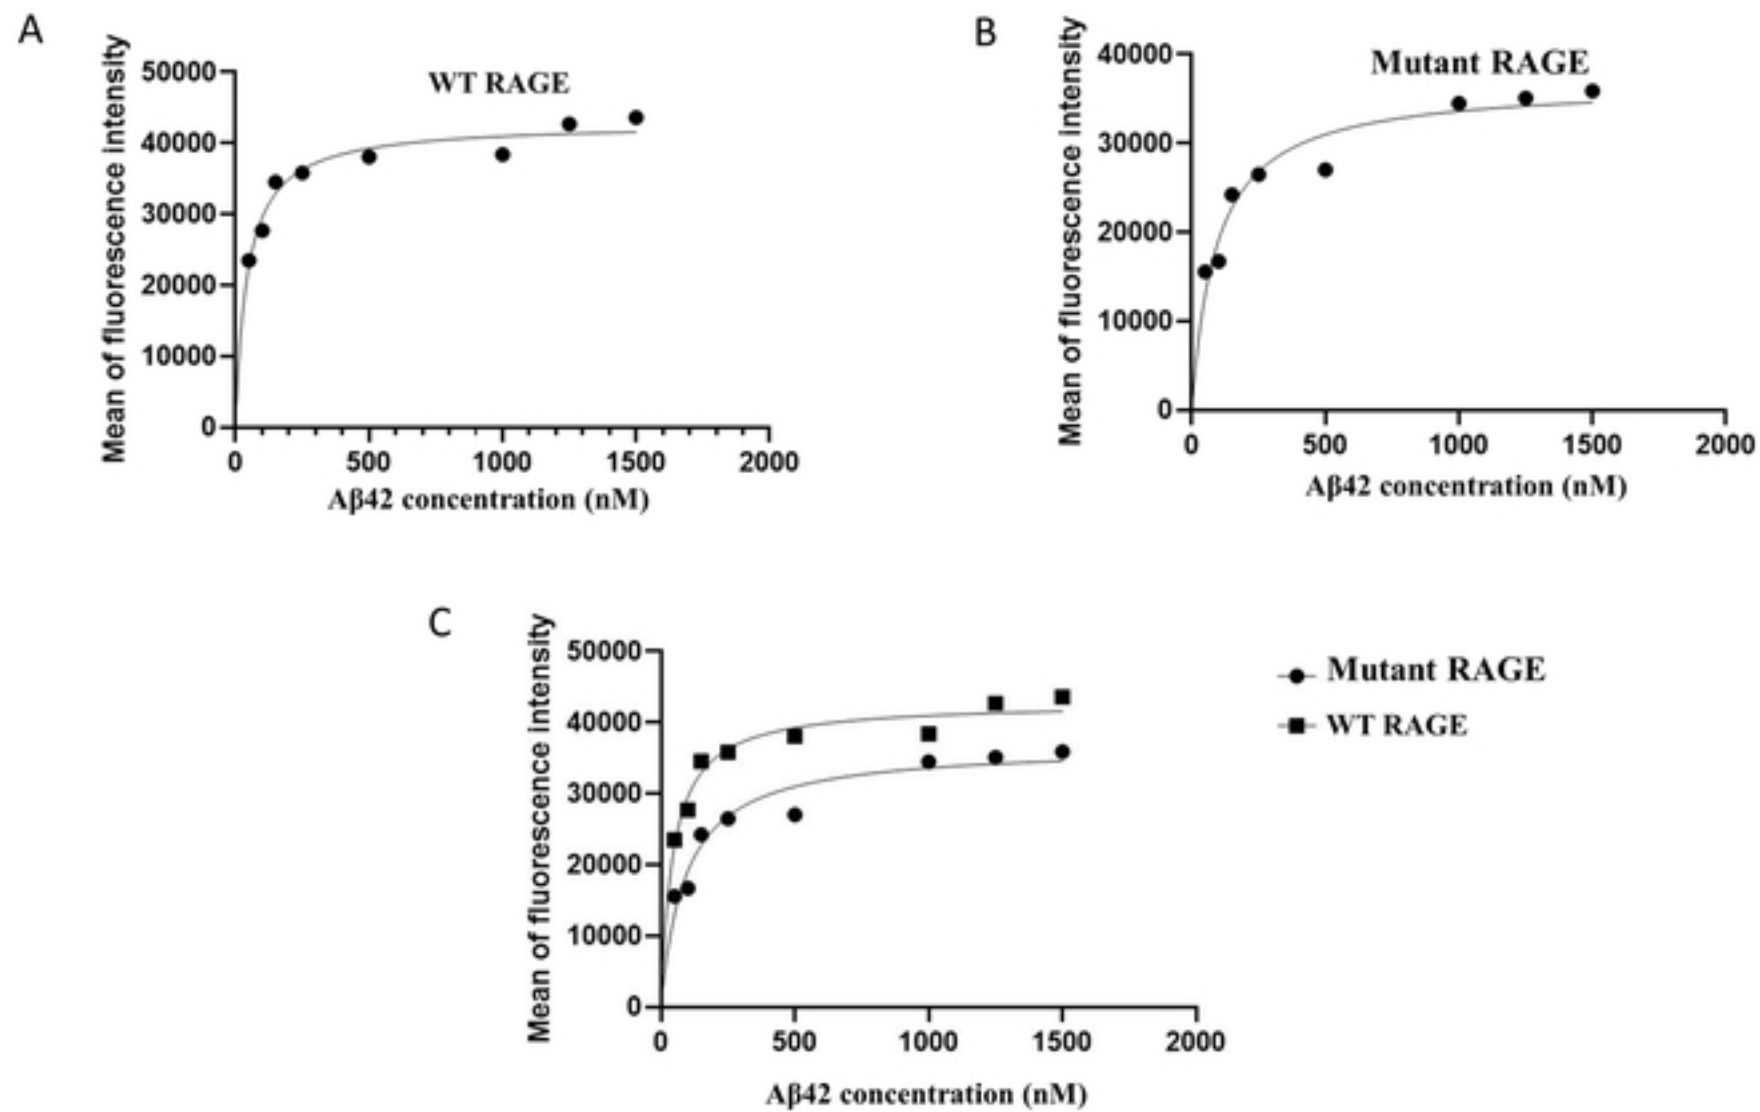

Figure 7



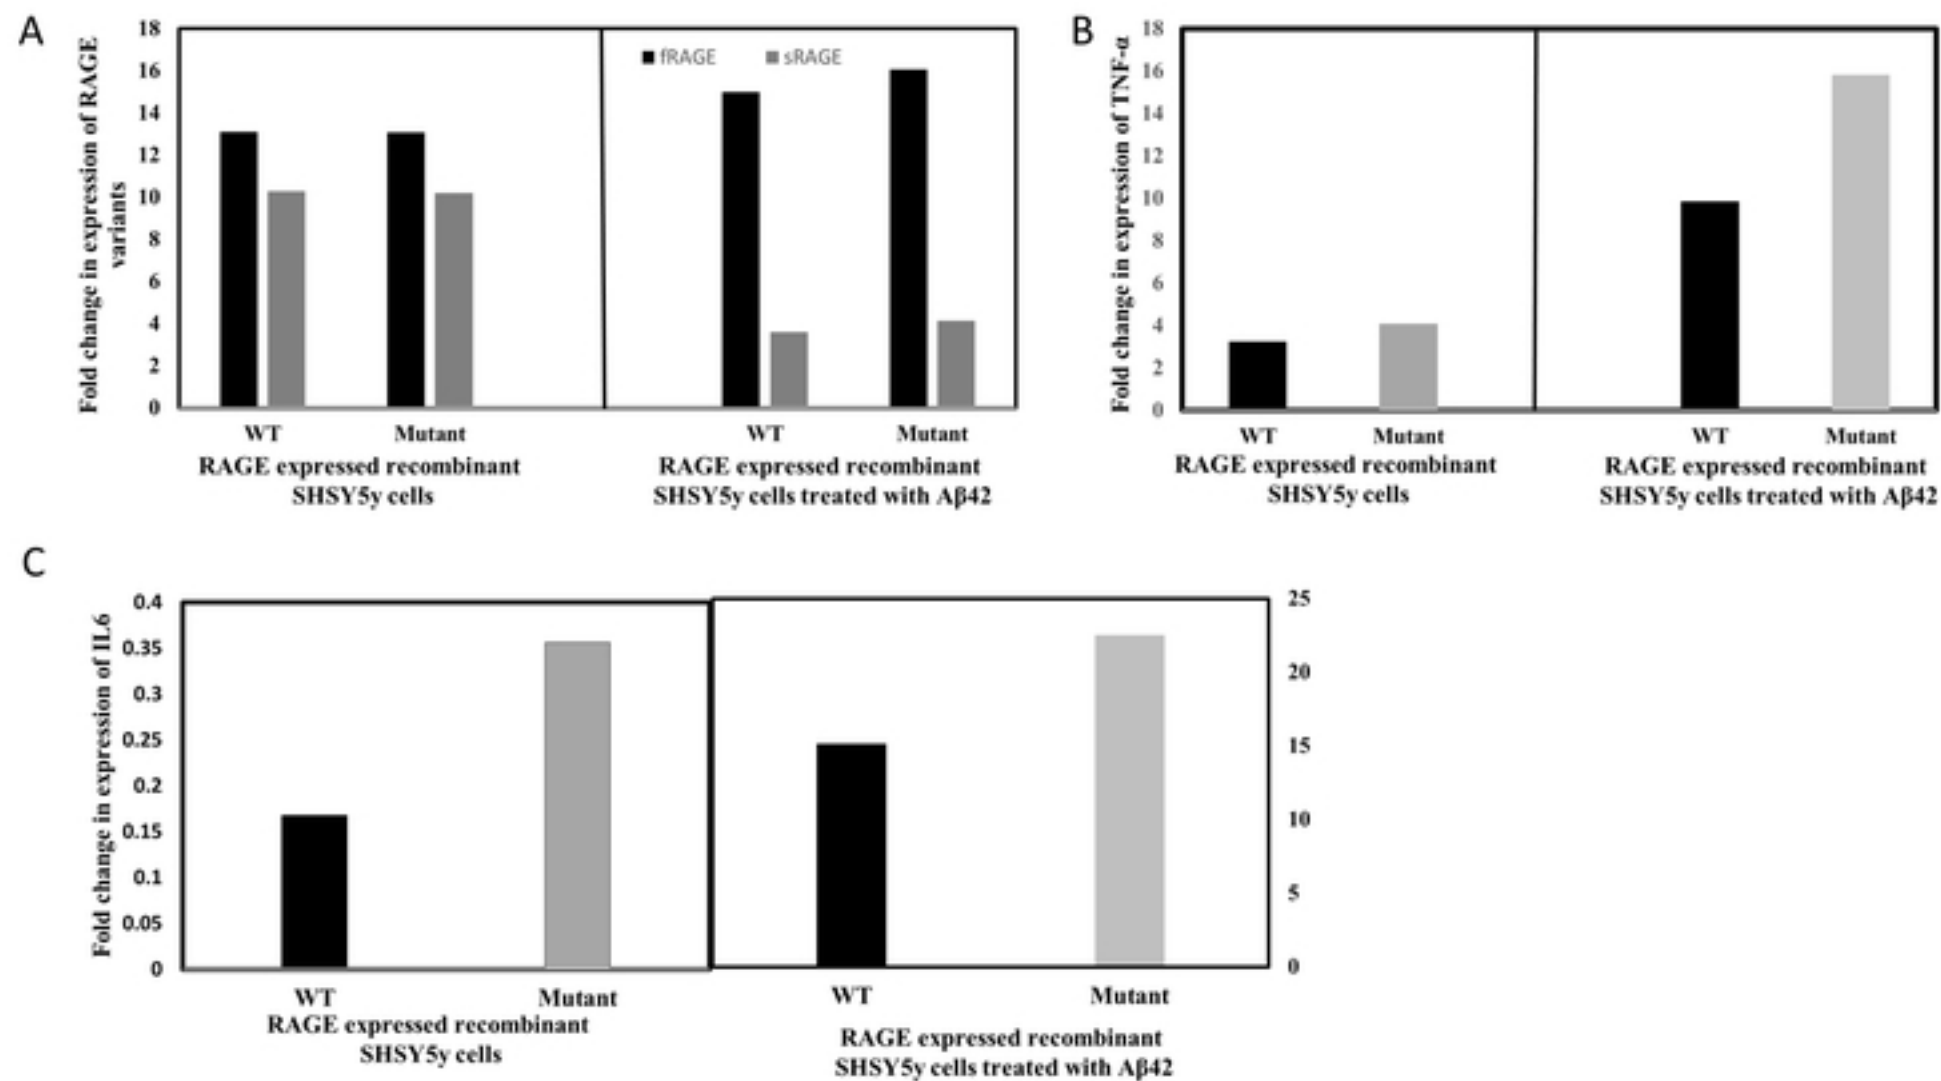

Figure 8
